1 **Title: Evidence for immediate enhancement of medial-temporal lobe memory processing by**  
2 **network-targeted theta-burst stimulation during concurrent fMRI**

3 **Abbreviated title:** Immediate theta-burst impact on memory

4 **Authors:** Molly S. Hermiller<sup>\*1-4</sup>, Yu Fen Chen<sup>5</sup>, Todd B. Parrish<sup>1,5,6</sup>, and Joel L. Voss<sup>1-4</sup>

5 **Affiliations:**

6 <sup>1</sup> Interdepartmental Neuroscience Program, Northwestern University

7 <sup>2</sup> Department of Medical Social Sciences, Feinberg School of Medicine, Northwestern University

8 <sup>3</sup> Ken & Ruth Davee Department of Neurology, Feinberg School of Medicine, Northwestern University

9 <sup>4</sup> Department of Psychiatry and Behavioral Sciences, Feinberg School of Medicine, Northwestern  
10 University

11 <sup>5</sup> Department of Radiology, Feinberg School of Medicine, Northwestern University

12 <sup>6</sup> Department of Biomedical Engineering, McCormick School of Engineering and Applied Science,  
13 Northwestern University

14 **\*Correspondence to:** [molly.hermiller@northwestern.edu](mailto:molly.hermiller@northwestern.edu)

15 **Conflict of interest:** The authors declare no competing financial interests.

16 **Acknowledgments:** We thank Rachael A. Young and Stephen VanHaerents for contributing to data  
17 collection. Neuroimaging was performed at the Northwestern University Center for Translational Imaging,  
18 supported by Northwestern University Department of Radiology. This research was supported in part  
19 through the computational resources and staff contributions provided for Quest, the high-performance  
20 computing facility at Northwestern University, which is jointly supported by the Office of the Provost, the  
21 Office for Research, and Northwestern University Information Technology. This research was supported  
22 by R01-MH106512 and R01-MH111790 from the National Institute of Mental Health and by T32-  
23 NS047987 and F31-NS111892 from the National Institute of Neurological Disorders and Stroke. The  
24 content is solely the responsibility of the authors and does not necessarily represent the official view of  
25 the National Institutes of Health.

26 **Abstract:** The hippocampus supports episodic memory via interaction with a distributed brain network.  
27 Previous experiments using network-targeted noninvasive brain stimulation have identified episodic  
28 memory enhancements and modulation of activity within the hippocampal network. However,  
29 mechanistic insights were limited because these effects were measured long after stimulation and  
30 therefore could have reflected various neuroplastic aftereffects with extended timecourses. In this  
31 experiment with human subjects of both sexes, we tested for immediate stimulation impact on memory-  
32 related activity of the hippocampus and surrounding cortex of the medial-temporal lobe (MTL) by  
33 delivering theta-burst transcranial magnetic stimulation (TBS) concurrent with fMRI, as an immediate  
34 impact of stimulation would suggest an influence on neural activity. We reasoned that TBS would be  
35 particularly effective for influencing the MTL because rhythmic neural activity in the theta band is  
36 associated with MTL memory processing. First, we demonstrated that it is possible to obtain robust fMRI  
37 signals of MTL activity during concurrent TBS. We then identified immediate effects of TBS on memory  
38 encoding of visual scenes. Brief volleys of TBS targeting the hippocampal network increased MTL  
39 activity during scene encoding and strengthened subsequent recollection. Stimulation did not influence  
40 MTL activity during an interleaved numerical task with no memory demand. Control conditions using  
41 beta-band stimulation and out-of-network stimulation also did not influence MTL activity or memory.  
42 These findings indicate that TBS targeting the hippocampal network immediately impacts MTL memory  
43 processing. This suggests direct, beneficial influence of stimulation on MTL neural activity related to  
44 memory and supports the role of theta-band activity in human episodic memory.

45 **Significance Statement:** Theta-burst noninvasive stimulation targeting the human hippocampal  
46 network immediately impacted memory processing measured during concurrent fMRI, suggesting that  
47 this rhythm is relatively privileged in its ability to influence neural activity related to memory.

## 48 **Introduction**

49           The hippocampus exhibits theta-band (~4-8 Hz) oscillatory neural activity that is thought to  
50 provide a temporal framework for coding information about life experiences into enduring memories  
51 (Buzsaki, 2002; Lisman and Jensen, 2013; Herweg et al., 2020). This memory function involves  
52 hippocampal interaction with a network of interconnected brain regions in medial-temporal, parietal, and  
53 prefrontal cortex (Squire and Zola-Morgan, 1991; Squire et al., 2004; Eichenbaum et al., 2007; Battaglia  
54 et al., 2011; Ranganath and Ritchey, 2012) which show interregional synchrony of memory-related  
55 activity preferentially in the theta band (Fell et al., 2001; Buzsaki and Draguhn, 2004; Foster et al., 2013;  
56 Lisman and Jensen, 2013; Staudigl and Hanslmayr, 2013). Although the functional significance of  
57 hippocampal theta oscillatory activity has been experimentally tested via stimulation in rodents  
58 (Shirvalkar et al., 2010; Zutshi et al., 2018), such direct functional tests present major challenges for  
59 human experimentation. It is reasonable to think that electrical stimulation of the hippocampus using a  
60 theta-rhythmic pattern, as in theta-burst stimulation (TBS; volleys of high-frequency stimulation delivered  
61 in a theta rhythm), should be capable of testing the role of theta in episodic memory. This is because  
62 theta-rhythmic stimulation such as TBS mimics the endogenous theta rhythm thought to support  
63 hippocampal memory processing and hippocampal network synchronization, and therefore should  
64 optimally influence this network's function via activity entrainment (Thut et al., 2011b; Chanes et al.,  
65 2013; Romei et al., 2016; Thut et al., 2017). However, direct electrical stimulation of the hippocampus  
66 and its immediate entorhinal inputs via depth electrodes in human neurosurgical cases typically disrupts  
67 memory, without necessary specificity to the theta band (Coleshill et al., 2004; Jacobs et al., 2016; Goyal  
68 et al., 2018).

69           An alternative approach targets the hippocampus indirectly via stimulation of its network. For  
70 instance, invasive electrical stimulation of the lateral temporal cortex area of the hippocampal network  
71 enhanced verbal memory in four human neurosurgical cases (Kucewicz et al., 2018) and "closed-loop"  
72 stimulation of approximately the same location based on neural correlates of successful memory caused  
73 a relative enhancement compared to the same stimulation of other brain regions, which was disruptive  
74 (Ezzyat et al., 2018). Of relevance to the theta rhythm, memory enhancement was achieved in a pilot  
75 study of four cases receiving TBS of the fornix (Miller et al., 2015). Further, TBS with microstimulation of

76 entorhinal cortex enhanced memory in several cases in which white matter (rather than gray matter) was  
77 targeted, presumably due to greater effects on network synchrony due to white matter stimulation (Titiz  
78 et al., 2017). These studies have provided preliminary evidence that invasive stimulation of the  
79 hippocampal network might modulate episodic memory, including when stimulation is delivered in a  
80 theta-rhythmic pattern. However, demonstrations of memory enhancement by invasive TBS (Miller et al.,  
81 2015; Titiz et al., 2017) did not include non-theta control stimulation frequencies, and therefore do not  
82 permit strong conclusions regarding the specific role of theta rhythms in human memory.

83 Noninvasive stimulation can also be used to test putative network functional properties (Fox et al.,  
84 2012). Robust group-level enhancement of episodic memory has been reported in multiple studies  
85 targeting the hippocampal network using noninvasive transcranial magnetic stimulation (TMS) in healthy  
86 individuals (Hebscher and Voss, in press). Network-targeted TMS increased hippocampal network fMRI  
87 connectivity and memory-related fMRI activity, and improved memory performance for hours to weeks  
88 after stimulation delivery (Wang et al., 2014; Kim et al., 2018; Tambini et al., 2018; Freedberg et al.,  
89 2019; Hermiller et al., 2019; Warren et al., 2020). One study using network-targeted TMS found that TBS  
90 had greater impact on memory accuracy and memory-related hippocampal fMRI connectivity than did  
91 TMS using a non-theta (20-Hz) control frequency (Hermiller et al., 2018). This finding is consistent with  
92 the hypothesized importance of hippocampal network theta activity for memory. However, a weakness of  
93 previous noninvasive stimulation experiments with respect to mechanistic interpretation is that these  
94 studies measured long-lasting aftereffects of stimulation (ranging from minutes to weeks), which could be  
95 mediated by a variety of indirect neuroplasticity mechanisms (Thickbroom, 2007). Better evidence for  
96 preferred influence of TBS on memory-related neural activity would require immediate assessment of  
97 stimulation impact.

98 To address this issue, we delivered TBS to a hippocampal-network-targeted location in the  
99 parietal cortex during concurrent fMRI while subjects performed a memory task. We developed custom  
100 fMRI parameters that allowed TBS as well as control-frequency (12.5 Hz) stimulation during concurrent  
101 fMRI without stimulation-related imaging artefact in areas of interest. Due to the neuroimaging limitations  
102 of concurrent TMS-fMRI, such as lack of full-brain coverage and signal distortion near the TMS coil, we

103 focused on effects of TBS on hippocampus and adjacent cortex of the medial temporal lobe (MTL), as  
104 high-quality fMRI signals could be obtained from these areas using our procedure.

105 Human subjects studied complex visual scenes that were each immediately preceded by different  
106 stimulation conditions. We hypothesized that TBS in the seconds immediately preceding individual scene  
107 stimuli would improve encoding success and increase fMRI signals of successful encoding in the MTL.  
108 The premise of this prediction is that greater MTL theta activity predicts more successful memory  
109 formation, particularly for complex associative memory information (Rutishauser et al., 2010; Fell et al.,  
110 2011; Herweg et al., 2020), and that TBS may increase the theta rhythm in the MTL due to neural  
111 entrainment (Thut et al., 2011a; Hanslmayr et al., 2019). We further hypothesized that enhancement of  
112 memory encoding and fMRI activity by TBS targeting the hippocampal network would be selective versus  
113 various control conditions, including controls for the cognitive task (memory versus non-memory), for the  
114 stimulation rhythm (theta versus non-theta), for the stimulation target (hippocampal-network-targeted  
115 versus out-of-network location), and for the hemisphere in which the hippocampal network was targeted  
116 (left versus right). Immediate and selective effects of hippocampal-network-targeted TBS on MTL  
117 memory-related activity would suggest that noninvasive stimulation can impact targeted regions' neural  
118 activity, rather than longer-term neuroplasticity processes, and would support the role of theta in human  
119 memory formation.

120

## 121 **Materials and Methods**

### 122 Overview

123 Following a baseline session, subjects completed a two-day experiment in which they attempted to  
124 remember complex visual scenes that were each immediately preceded by different stimulation  
125 conditions, performed during fMRI scanning. The main condition of interest was TBS delivered to a  
126 hippocampal-network targeted (HNT) location in the parietal cortex immediately before the onset of  
127 scenes. Several control conditions were used to test specificity. Subjects also received stimulation  
128 immediately before the presentation of numeric judgments, interleaved randomly with the scenes  
129 throughout the task (Fig. 1A). We expected no effect of stimulation on hippocampal activity for this  
130 condition, as hippocampal activity is generally not evoked by numeric judgments (Stark and Squire,

131 2001) and therefore would not increase via direct effects of stimulation on hippocampal neural activity.  
132 Furthermore, the same scene and number conditions were administered in three control stimulation  
133 conditions: (i) a different stimulation pattern (beta; 12.5 Hz) (Fig. 1B) applied to the same HNT location,  
134 (ii) TBS applied to a control location in the supplementary motor area (SMA) outside the hippocampal  
135 network (Fig. 1C), and (iii) beta stimulation of the SMA location. None of these control conditions were  
136 expected to influence downstream MTL activity. Finally, stimulation was not delivered for a subset of  
137 scene and number trials, providing a no-stimulation (“off”) control condition. Scene and number trials with  
138 and without stimulation were intermixed throughout scanning sessions, guarding against confounding  
139 influences such as stimulation-induced fMRI artifact and stimulation carry-over effects across trials. All  
140 conditions were administered in each subject using a within-subjects counterbalanced design over two  
141 experimental sessions (Fig. 1D).

### a. Study-phase trial conditions (fMRI)

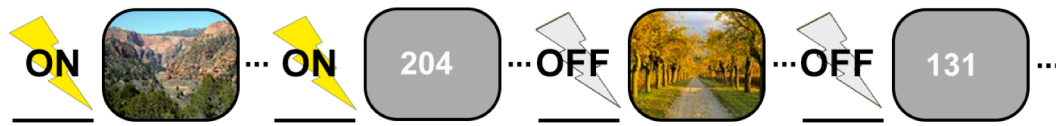

### b. Stimulation patterns

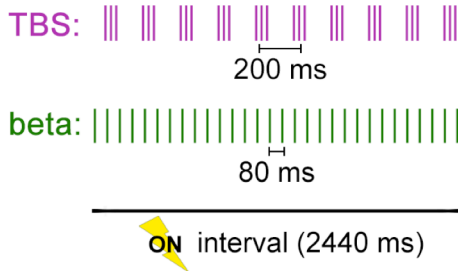

### c. Stimulation locations

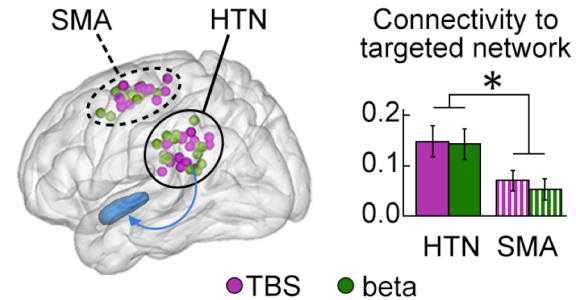

### d. Experiment design

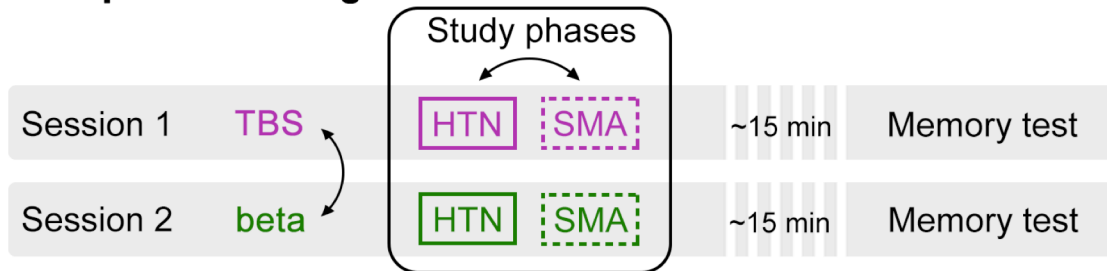

**Figure 1. Trial-specific stimulation during episodic memory formation.** (A) Scene-encoding and numeric-judgment trials were randomly intermixed during each study phase, with ~2 s of stimulation delivered immediately before stimulus onset for a subset of trials (ON) and no preceding stimulation for remaining trials (OFF). Study phases were completed during fMRI scanning with memory test phases after scanning. There were four stimulation conditions for ON and OFF trials. (B) Stimulation was delivered as either a theta-burst pattern (TBS: 50 Hz triplet pulses delivered at 5 Hz) or at beta (single pulses delivered at 12.5 Hz). These conditions had the same overall number of pulses during each stimulation period delivered at the same intensity. (C) Stimulation was delivered to the HNT parietal location (based on its fMRI connectivity with left hippocampus, as depicted by the blue arrow), or a control out-of-network SMA location. Achieved stimulation locations confirmed via MRI for each condition and subject are indicated by colored spheres on a template brain. Bar plots represent mean  $\pm$ s.e.m. baseline resting-state fMRI connectivity of the subject-specific stimulation locations with the hippocampal network, confirming relatively higher connectivity for the HNT than SMA location. \* $P < 0.05$  main effect of location by one-way rmANOVA. (D) HNT or SMA locations were targeted for one of the two study phases in each experimental session. After both study phases were complete, subjects exited the scanner for a ~15 min break before taking the memory test. A different stimulation pattern (TBS or beta) was used for each experimental session. Black arrows indicate stimulation conditions with order counterbalanced across subjects.



143 Subjects

144 Adult subjects passed standard MRI and TMS safety screenings (Rossi et al., 2009), reported no present  
145 use of psychoactive drugs, and were free of known neurological and psychiatric conditions. Datasets  
146 from 16 subjects were included in all reported analyses (8 females, ages 20-35 years, average  
147 age=27.6, SD=4.32). Data from two additional subjects were collected but excluded from all reported  
148 analyses due to poor behavioral performance (overall miss rate > 50%). In addition, data collection was  
149 attempted from three additional subjects but failed due to technical malfunction (n=2) or attrition (n=1).  
150 Subjects gave written informed consent approved by the Northwestern University Institutional Review  
151 Board and were paid for participation. The sample size of N=16 was chosen to match or exceed previous  
152 experiments that demonstrated memory improvement for stimuli encoded following short volleys of TMS  
153 (i.e., <2 s TMS immediately before stimulus onset) (Kohler et al., 2004; Demeter et al., 2016).

154

155 Baseline session

156 Subjects completed a baseline session to determine stimulation locations and intensity prior to two  
157 experimental sessions, performed on different days (described below).

158

159 *Baseline MRI to determine stimulation locations*

160 Resting-state fMRI and structural MRI were collected using a 3T Siemens PRISMA scanner with  
161 a 64-channel head/neck coil. Baseline resting-state functional images were acquired using a blood-  
162 oxygenation-level-dependent (BOLD) contrast sensitive gradient-echo echo-planar imaging (EPI)  
163 pulse sequence (270 frames; TE 20 ms; TR 2000.0 ms; flip angle 80°; voxel resolution 1.7 mm isotropic;  
164 70 ascending axial slices; 210x203 mm FOV; scan duration 9 min). During the resting-state scan  
165 subjects were instructed to lie as still as possible, to keep their eyes open and focused on a fixation cross  
166 presented in the center of the screen, and to let their minds wander. Structural images were acquired  
167 using a T1-weighted MPRAGE sequence (176 frames; TE 1.69 ms; TR 2170 ms; TI 1100 ms; flip angle  
168 7°; voxel resolution 1.0 mm isotropic; 256x256 mm FOV; GRAPPA acceleration of a factor of 2; scan  
169 duration 6.36 min).



170 Baseline scans were submitted to resting-state fMRI connectivity analysis to determine  
171 stimulation locations. All fMRI analyses used AFNI (Cox, 1996) and were visualized with the BrainNet  
172 Viewer Matlab (The MathWorks, Inc. Natick, MA, USA) toolbox (Xia et al., 2013) on a smoothed Colin27  
173 template. Anatomical scans were skull-stripped (*3dSkullStrip*) and co-registered to standardized space  
174 using the Colin27 template (*auto\_tlrc*). Preprocessing of the functional volumes included outlier  
175 suppression (*3dDespike*), slice timing and motion correction (*3dvolreg*), and co-registration to the  
176 anatomical scan (*align\_epi\_anat*). The transformations were applied simultaneously in a single  
177 resampling step (*3dAllineate*). Motion parameters were calculated for each volume as the Euclidean  
178 norm of the first difference of six motion estimates (three translation and three rotation). Volumes with  
179 excessive motion ( $>0.2$  mm), as well as the previous volume, were censored. On average, 0.42%  
180 (SD=1.11, range=0-4.44%) of the resting-state volumes were censored. Data were spatially smoothed  
181 using a 4-mm full-width-at-half-maximum (FWHM) isotropic Gaussian kernel (*3dmerge*) and signal  
182 intensity was normalized by the mean of each voxel. EPI masks were created that included only voxels in  
183 the brain that were not excluded due to instability by *3dAutomask*. Bandpass filtering (0.01-0.1 Hz),  
184 motion censoring, and nuisance time series (estimates of motion parameters and their derivatives) were  
185 detrended from each voxel simultaneously (*3dDeconvolve*, *3dTproject*) to yield a residual time series  
186 used in connectivity analyses.

187 Seed-based resting-state fMRI connectivity was used to determine subject-specific stimulation  
188 locations used in the subsequent concurrent TMS-fMRI experimental sessions. For each subject, a 2 mm  
189 seed in the left hippocampus (MNI: -30 -18 -18) was used in a seed-based functional connectivity  
190 analysis (*3dTcorr1D*) to identify a left lateral parietal cortex location with robust fMRI connectivity to a left  
191 hippocampal seed (mean  $z(r)=0.38$ , SD=0.05; average MNI: -53 -41 27). This was the stimulation  
192 location used for hippocampal-network-targeted (HNT) stimulation (Fig. 1C). The control out-of-network  
193 stimulation location was set in the left supplementary motor area (SMA; average MNI: -36 -3 67), a  
194 region outside of the targeted hippocampal network. Both the HNT and SMA locations allowed the TMS  
195 coil to be positioned in the scanner without blocking the subjects' view of the screen. Due to coil  
196 displacement during scanning, the actual achieved stimulation locations deviated from these intended  
197 targets (see below and Fig. 1C).

198

199 *Stimulation intensity determination*

200 TMS was delivered with a MagPro X100 stimulator using a MagPro MRi-B91 air-cooled butterfly  
201 coil and MRI-compatible TMS setup (MagVenture A/S, Farum, Denmark). Resting motor threshold (RMT)  
202 was found during the baseline session in order to determine the stimulation intensity used during the  
203 experimental sessions (see below). Subjects sat at the entrance of the MRI bore with their arms resting  
204 comfortably during RMT determination. The MRi-B91 TMS coil was used to determine RMT as the  
205 minimum percentage of stimulator output (% SO) necessary to generate a visible contraction of the right  
206 thumb (*abductor pollicis brevis*) for five out of ten consecutive single pulses. Pulses were biphasic, as  
207 were pulses delivered during experimental sessions. RMT values ranged between 45.0-85.0% SO  
208 (mean=61.6, SD=10.8).

209

210 Experimental Sessions

211 Following the baseline session, subjects returned for two experimental TMS/fMRI sessions on separate  
212 days to complete a 2x2 crossover design. One stimulation pattern (TBS or beta) was used during each  
213 session. Within each session, there were two study phases that differed in stimulation location (HNT or  
214 SMA). The order of these conditions (TBS or beta session; HNT-then-SMA or SMA-then-HNT within  
215 each session) was counterbalanced across subjects. Memory for scenes encoded during both study  
216 phases was tested at the end of the experimental session, after subjects finished MRI scanning.

217

218 *Experiment Design*

219 There were two study phases during each of the two experimental sessions. Each study phase  
220 lasted ~70 min and comprised 144 trials (288 trials total for the session). Each trial began with a white  
221 fixation cross presented in the center of the screen, during which ~ 2 s stimulation was delivered (see  
222 TMS/fMRI acquisition methods for exact timing). Immediately following stimulation, a visual stimulus was  
223 presented for 2 s. The study item was followed by a white fixation cross that remained on the screen until  
224 the next trial for a randomly varied duration between 11-19.5 s. Different visual stimuli were presented  
225 during each study phase. Complex visual scenes (50% of trials; 144 scenes total for the session) were

226 randomly intermixed with numeric stimuli (50% of trials; 144 numbers total for the session). During the  
227 scene presentation, subjects were instructed to imagine visiting the depicted location and to rate via  
228 button press whether they would like to visit the location (right hand button) or not (left hand button).  
229 Scenes were chosen from the SUN397 dataset (Xiao et al., 2016) based on the following criteria:  
230 complex outdoor natural scenes (e.g., mountains, beaches, forests, waterfalls, deserts) without  
231 prominent humans, animals, or man-made objects; color image; image did not include text. Subjects  
232 were told that memory would be tested for all scenes following the study phase (i.e., intentional  
233 encoding). Numeric stimuli were randomly selected from the integers 1-864 and presented in white font  
234 for 2 s. Subjects used a button response to indicate if the number was even (right hand button) or odd  
235 (left hand button). Visual stimuli were randomly assigned to either a study trial stimulation condition or to  
236 serve as a lure during memory testing (see below) for each subject. Stimuli were presented in the center  
237 of an MRI-compatible LCD screen (Nordic Neuro Lab, Bergen, Norway) positioned at the subjects' feet,  
238 on a gray background, viewed via a mirror attached to the head coil. Responses with hand-held fiber  
239 optic button boxes (Current Designs, Inc., Philadelphia, PA, USA). Subjects were told that they could  
240 make their responses during the white fixation cross following each stimulus and that response times  
241 were not important (i.e., self-paced responses).

242 Stimulation was delivered for ~2 s (see TMS/fMRI acquisition methods for exact timing)  
243 immediately preceding stimulus onset for 66% of scene and numeric trials (i.e., stimulation presence on),  
244 with no stimulation for the remaining trials (i.e., stimulation presence off). Long inter-trial intervals (11-  
245 19.5 s) were used to reduce stimulation carry-over effects (Huang et al., 2005). During one study phase  
246 stimulation targeted the hippocampal network via left parietal cortex (HNT), and during the other study  
247 phase stimulation targeted the SMA, with a break of ~10 min between study phases for TMS coil  
248 repositioning. The order of these conditions was counterbalanced across subjects. Prior to getting in the  
249 scanner for the study phases, MRI-navigated TMS software (Localite GmbH, St. Augustin, Germany)  
250 was used to physically mark the individualized stimulation locations on the participant's scalp. A  
251 conformable MRI-compatible marker was affixed to the scalp at the intended stimulation location (12.7  
252 mm x 12.7 mm re-sealable plastic bag filled with yellow-mustard MRI contrast agent; Plochman, Inc.,

253 Manteno, IL, USA). The markers were used to position the TMS coil against the subject's head in the  
254 scanner and coil location was recorded via MRI anatomical scans during each study phase (see below).

255 One experimental session used TBS and the other used beta TMS, administered in  
256 counterbalanced order across subjects. For both stimulation patterns, 30 TMS pulses were delivered  
257 during the 2 s prior to stimulus onset per trial, delivered at the same intensity for each subject (80%  
258 RMT). For TBS, pulses were delivered as 50 Hz triplets at 5 Hz. For beta stimulation, pulses were  
259 delivered individually at 12.5 Hz. TMS pulses were synchronized with the MRI scan and with visual  
260 stimulus onset (see below). To acclimate subjects to the stimulation protocols and to ensure that  
261 stimulation did not cause scalp/facial twitches, a train of stimulation was applied once the subject was  
262 positioned inside the scanner and the TMS coil was positioned at the targeted location before scanning  
263 in each study phase. Stimulation intensity was lowered during one or both sessions due to technical  
264 limitations for 5 subjects. On average, TBS was delivered at 78.8% RMT (SD=1.9, range=75.0-80.0) and  
265 beta stimulation was delivered at 78.5% RMT (SD=2.2, range=74.1-80.0). The experimental sessions  
266 were scheduled at least two days apart, with an average of 27 days between sessions (range=3-84  
267 days). For 1 subject, a session was discarded due to technical difficulties and the subject returned for a  
268 third "replacement" session. The replacement session was performed with the same location and pattern  
269 order as the discarded session, but with different visual stimuli.

270 At the end of each experimental session, memory was tested for the scenes that were presented  
271 during both of the study phases for that session (one study phase with HNT stimulation and one with  
272 SMA stimulation). After completing both study phases, subjects rested out of the scanner for ~15 min  
273 before taking the memory test, which was not scanned. The 144 scenes presented during the study  
274 phases were presented one at a time intermixed randomly with 144 novel lures that were not presented  
275 during study phases, in randomized order. Subjects responded with (i) "Remember" if they specifically  
276 recalled details about seeing the scene, (ii) "Familiar" if they recognized the scene but could not  
277 specifically recollect seeing it, and (iii) "New" if the scene was a lure (Yonelinas, 2002; Eichenbaum et al.,  
278 2007). Trials were self paced, with the scene remaining on the screen until a response was registered.  
279 The duration of the test phases was 20.8 min on average (range=14-29, SD=4.48).

280

281 *Simultaneous TMS/fMRI acquisition*

282 MRI was performed during study phases using a 3T Siemens PRISMA scanner with a single-  
283 channel transmitter/receiver head coil. Fast low-angle shot (FLASH) anatomical scans were collected  
284 between study phases to localize the actual location of the TMS coil relative to markers placed on the  
285 scalp, including a T1 sagittal (50 slices; TE 2.42 ms; TR 311.0 ms; flip angle 80°; 1.0 mm inplane  
286 resolution; 4.0 mm thick sagittal slices with 0 mm gap; 50% phase oversampling; 256x256 mm FOV;  
287 scan duration 44 sec) and a T1 oblique axial (40 slices; TE 2.42 ms; TR 249.0 ms; flip angle 80°; 1.0 mm  
288 inplane resolution; 4.0 mm thick axial slices with 0 mm gap; 60% phase oversampling; 256x256 mm  
289 FOV; scan duration 36 sec). These anatomical scans were later used to localize the TMS coil targeting  
290 displacement (see below).

291 We developed two fMRI scan sequences to interface with TMS pulses for the TBS and beta-  
292 patterned stimulation conditions. Task-based functional images were acquired using a BOLD contrast  
293 sensitive gradient echo EPI pulse sequence that contained custom programmed temporal gaps  
294 interleaved between slice acquisitions. Rather than delivering stimulation during slice acquisition, which  
295 causes TMS-induced artifact that requires volumes to be discarded (Bestmann et al., 2008; Siebner et  
296 al., 2009), TMS was delivered between MRI slice acquisitions during the inserted temporal gaps. This  
297 TMS-fMRI method did not cause artifact beyond that associated with the physical presence of the TMS  
298 coil, which produces stable artifact near the coil (see Results).

299 For both stimulation patterns, 30 pulses were delivered during the imaging volume immediately  
300 prior to visual stimulus onset for conditions that involved stimulation. Pulses were delivered over a  
301 duration of 2000 ms in the TBS condition (Fig. 2A) and 2400 ms in the beta-patterned stimulation  
302 condition (Fig. 2B), for a total of 5760 pulses aggregate over the entire experimental session. For TBS,  
303 107-ms temporal gaps were inserted after every two EPI slices (93 ms). During this temporal gap, a 50  
304 Hz triplet burst (pulse every 20 ms) was delivered, with one triplet burst delivered every 200 ms during  
305 such temporal gaps (665 frames; TE 20 ms; TR 2230.0 ms; 2442 Hz/pixel bandwidth; flip angle 90°;  
306 voxel resolution 3.0 mm isotropic; 22 interleaved 3.0 mm thick axial slices angled to AC-PC alignment  
307 and centered on the longitudinal axis of the temporal lobes; 50% phase oversampling in the phase-  
308 encoding direction; 192x192 mm FOV; scan duration 24.83 min; 72 trials per scan) (Fig. 2A). For beta-

309 patterned stimulation, 34-ms temporal gaps were inserted after each slice (46 ms), in which a single TMS  
310 pulse could be delivered, such that one pulse was delivered every 80 ms during such temporal gaps  
311 (270 frames; TE 20 ms; TR 2440.0 ms; 2442 Hz/pixel bandwidth; flip angle 90°; voxel resolution 3. mm  
312 isotropic; 30 interleaved 3.0 mm thick axial slices angled to AC-PC alignment and centered on the  
313 longitudinal axis of the temporal lobes; 50% phase oversampling in the phase-encoding direction;  
314 192x192 mm FOV; scan duration 28.38 min; 72 trials per scan) (Fig. 2B). The scans were programmed  
315 such that the last TMS pulse would occur at the end of the TR (i.e., all pulses during the final 2000 ms of  
316 the 2230 ms TR for the TBS scan and during the last 2400 ms of the 2440 ms TR of the beta-patterned  
317 stimulation scan). Phase oversampling in the phase-encoding direction was used in both scans to shift  
318 any Nyquist ghosting induced by the presence of the TMS coil outside the brain.  
319

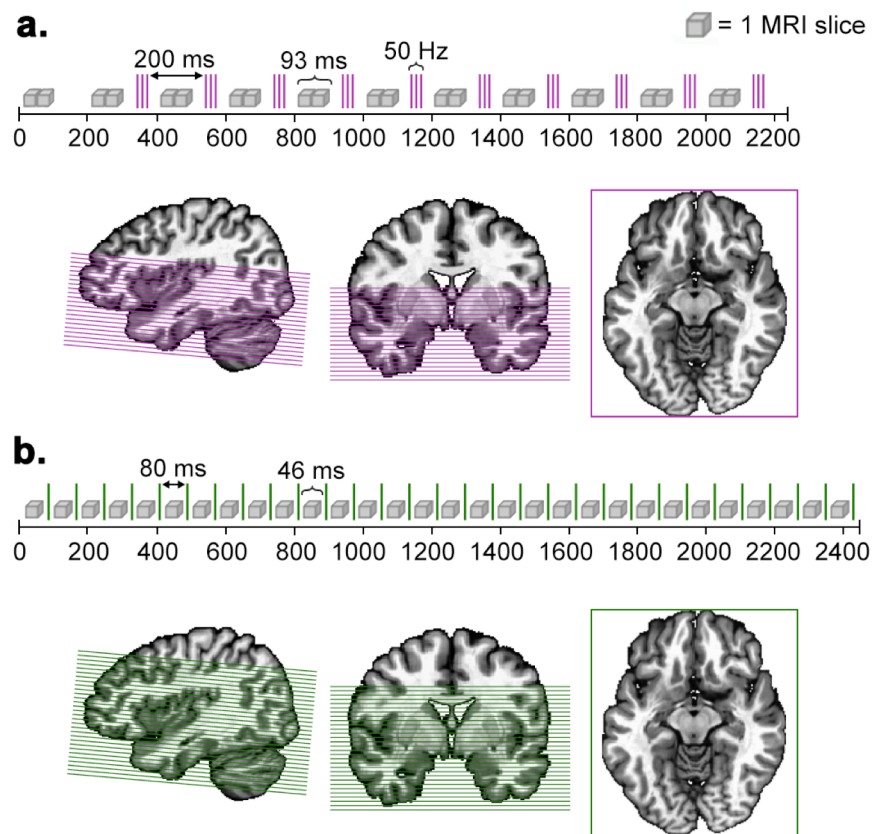

**Figure 2. Interleaved TMS/fMRI scan sequences.** Depiction of one imaging volume in the (A) TBS and (B) beta scan sequences. Each grey cube represents one MR EPI slice acquisition and each colored line indicates a TMS pulse (purple for TBS; green for beta). The extent of imaging coverage (22 EPI slices for TBS; 30 EPI slices for beta) is shown on a template brain, with EPI slices colored to match the TMS pulses (purple for the TBS scan; green for the beta scan).



320 The limited coverage in both the theta- and beta-patterned task-based scans precluded whole-  
321 brain imaging but did adequately cover MTL regions of interest when the imaging volume was centered  
322 at the MTL (Fig. 2AB). Notably regions imaged directly under/around the TMS coil typically exhibit  
323 irreparable TMS-induced artifacts (Bestmann et al., 2008; Siebner et al., 2009), but the parietal cortex  
324 and SMA stimulation locations did not fall within our limited coverage. Our hypothesis-driven regions of  
325 interest were instead in downstream regions distant from the stimulation location. We confirmed image  
326 quality by subject-level visual inspection, as well as validating signal quality at the group-level (see  
327 Results). Two task-based scans using the same parameters were acquired per the two study phases  
328 during each experimental session (~70 min per phase, 144 trials per phase). Participants wore air-  
329 conduction earplugs during the scans to attenuate both scanner and TMS noise.

330 A PC in the MRI control room received transistor-transistor logic (TTL) pulses from the MR  
331 scanner and, based on the experiment code, then sent TTL pulses to the TMS device to trigger  
332 stimulation at appropriate times. TTL pulses were sent per EPI slice acquisition to the experiment control  
333 PC, which in turn triggered the TMS device to deliver the programmed stimulation sequence. Thus,  
334 stimulation delivery was trial-specific and time-locked to the slice-based MR trigger. During the study  
335 phases, experiment events (e.g., pulse signals from the MRI and TMS, stimulator settings, participant  
336 responses, task stimuli, etc.) were monitored and recorded in output files created by Presentation  
337 (Neurobehavioral Systems, Inc. Berkeley, CA, USA), MagVenture (MagVenture A/S, Farum, Denmark),  
338 and LabChart (ADInstruments, Inc. Colorado Springs, CO, USA), as well as by the experimenter in the  
339 MRI control room. These records were used by the experimenter to update copies of raw output files with  
340 trial-specific deviations (i.e., trials were discarded if only part of the stimulation train was delivered due to  
341 coil over-heating; records reflected that the trial condition changed from 'ON' to 'OFF' if stimulation failed  
342 entirely during the 2-s pre-stimulus period).

343

#### 344 *TMS coil displacement during fMRI*

345 We used FLASH anatomical MRI scans (see above) collected before and after the study phase  
346 fMRI scans to evaluate the actual location of the TMS coil during the experiment relative to its intended  
347 location to account for possible displacement. The scans were uploaded into the MRI-navigated TMS



348 software (Localite GmbH, St. Augustin, Germany) and aligned to the subject's high-resolution anatomical  
349 scan collected during the baseline session. We utilized contrast-agent markers on the TMS coil (vitamin  
350 E capsules and oil-filled tubing) and on the scalp (mustard packets) to identify the position, orientation,  
351 and rotation of the TMS coil inside the scanner (i.e., 4D Matrix of coordinates) relative to the target that  
352 was identified based on resting-state fMRI for each subject (see above). The matrices were transformed  
353 with a displacement vector to estimate the cortical coordinates directly under the TMS coil. The across-  
354 participant mean MNI coordinates of the achieved HNT location was -50, -52, 32 (SD=4.8, 6.7, 6.8) for  
355 the TBS session and -49, -51, 33 (SD=4.8, 7.7, 7.3) for the beta stimulation session. The SMA location  
356 was -31, -16, 66 (SD=5.4, 9.0, 3.7) for the TBS session and -32, -13, 63 (SD=6.0, 9.3, 5.5) for the beta  
357 stimulation session. For each participant and condition, the deviation in achieved versus intended  
358 stimulation locations was calculated as the Euclidean distance. For the TBS and beta-patterned  
359 sessions, there was an average deviation of 8.47 mm (SD=4.04) for the HNT condition and a deviation of  
360 9.02 mm (SD=4.12) for the SMA condition. The amount of deviation did not significantly vary between  
361 the two locations ( $P>0.7$ ).

362 To confirm that the HNT and SMA conditions differentially targeted the hippocampal network as  
363 intended despite the in-scanner coil displacement, we analyzed resting-state fMRI connectivity of the  
364 achieved stimulation location (considering displacement) with the hippocampal network. Using the high-  
365 resolution resting-state fMRI scan collected at baseline, we calculated the hippocampal network as  
366 regions with robust connectivity to the left hippocampus (defined as 2-mm spherical segments centered  
367 at MNI coordinates: -23, -10, -21; -26, -14, -20; -30, -18, -18; -31 -22 -14; -30, -26, -12; see below for  
368 description of these locations in the task-based fMRI analysis). The hippocampal functional connectivity  
369 map for each subject was created by correlating (Pearson's  $r$ ) the spatially averaged time series of these  
370 hippocampal coordinates with every voxel's time series ( $3dTcorr$ ). A Fisher's  $z$  transformation was  
371 applied to yield a normally distributed correlation map for each subject ( $3dcalc$ ). Group-level voxel-wise  
372 analysis of these connectivity maps using one-sample one-tailed  $t$ -tests ( $3dttest++$ ) identified clusters of  
373 contiguous voxels with robust connectivity to the hippocampal seed mask (300+ voxels with  $z(r)$   
374 significantly greater than 0;  $t$ -threshold=5.2;  $P<0.0001$ ). These clusters were saved as a hippocampal  
375 network mask ( $3dclust$ ; 6,695 voxels total). For each subject, we then assessed resting-state connectivity

376 between the achieved stimulation location to every voxel in the hippocampal network mask (*3dTcorr*) and  
377 spatially averaged the correlation value to obtain one overall network connectivity value for each  
378 stimulation condition for every subject (*3dmaskave*). A 2x2 repeated measures ANOVA testing the  
379 effects of stimulation location and pattern on connectivity to the hippocampal network indicated  
380 significant variation by location ( $F_{1,12}=4.83$ ,  $P=0.04$ ,  $\eta^2_p=0.24$ ), such that connectivity was significantly  
381 greater for the HNT locations (mean=0.15, SD=0.12) relative to the SMA locations (mean=0.06,  
382 SD=0.07) (Fig. 1C). Thus, differential targeting of the hippocampal network by the HNT and SMA  
383 locations was successful despite coil displacement during fMRI scanning.

384

### 385 *Subject-level task-based fMRI processing*

386 Anatomical scans were skull-stripped (*3dSkullStrip*) and co-registered to the Colin27 template  
387 (*auto\_tlrc*). Preprocessing of the functional volumes included outlier suppression (*3dDespike*), slice  
388 timing and motion correction (*3dvolreg*), and co-registration to the anatomical scan (*align\_epi\_anat*). The  
389 transformations were applied simultaneously in a single resampling step (*3dAllineate*). Motion  
390 parameters were calculated for each volume as the Euclidean norm of the first difference of six motion  
391 estimates (three translation and three rotation). Volumes with excessive motion ( $>0.3$  mm), as well as the  
392 previous volume, were flagged for censoring during the regression analyses, which is a typical threshold  
393 for task-based fMRI analysis. On average, 2.8% (SD=5.0) of the TBS HNT condition, 3.6% (SD=6.1) of  
394 the TBS SMA condition, 5.0% (SD=8.0) of the beta HNT condition, and 5.9% (SD=10.2) of the beta SMA  
395 condition time series were motion censored. There was no significant difference in the amount of  
396 censoring across conditions (all pairwise comparison  $P_s>0.10$ ). Data were spatially smoothed using a 6-  
397 mm full-width-at-half-maximum (FWHM) isotropic Gaussian kernel (*3dmerge*) and signal intensity was  
398 normalized by the mean of each voxel. Task-based masks were created that consisted only of voxels in  
399 the brain with stable signal across the scanning sessions (*3dAutomask*).

400 Two general linear models (GLMs) incorporating hemodynamic response deconvolution were  
401 applied to the preprocessed data to estimate voxel-wise event-related activity regression coefficients for  
402 each trial type, separately for each stimulation condition (HNT TBS, SMA TBS, HNT beta, and SMA  
403 beta) (*3dDeconvolve*). GLMs were constructed separately per condition because differences in the scan

404 parameters required for TBS versus beta stimulation precluded concatenation of all conditions into one  
405 GLM. In each GLM, trials were separated based on experiment condition (scenes with TMS ON, scenes  
406 with TMS OFF, numbers with TMS ON, and numbers with TMS OFF). In a second GLM, the scene trials  
407 were further sorted by subsequent memory performance (Remember, Familiar, or New responses during  
408 the test). Time points with motion spikes and time series outliers were censored. Polynomial trends and  
409 motion estimates and their derivatives were included as nuisance regressors of no interest. Condition-  
410 specific activity estimates used the duration-modulated gamma function. Each condition of interest (HNT  
411 TBS, SMA TBS, HNT beta, and SMA beta) was modeled, with each event beginning at the stimulus  
412 (scene or number) onset. Restricted Maximum Likelihood (REML) estimation methods were used to  
413 generate voxel-wise parameter estimates and measures of variability for each trial type for each  
414 stimulation condition (*3dREMLfit*). Parameter estimates from each subject were later analyzed at the  
415 group-level (see below)

416

## 417 Data analysis

### 418 *Memory performance*

419 Performance on the scene recognition test was computed as the rate of hits (“Remember” and  
420 “Familiar” responses for studied scenes) and correct rejections (“New” response for novel lures) for each  
421 subject separately for every stimulation condition. To evaluate stimulation effects on hippocampal-  
422 dependent recollection, we calculated the proportion of hits that were recollected (“Remember”  
423 responses) for every stimulation condition.

424

### 425 *Group-level task-based fMRI analyses*

426 Voxel-wise analyses were performed in order to confirm that our scan parameters provided  
427 sensitivity to expected fMRI correlates of cognitive processing (i.e., scenes but not numbers should  
428 evoke activity in parahippocampal, fusiform, and occipital regions (Stern et al., 1996; Stark and Squire,  
429 2001) and stimulation sensations (i.e., sound emitted by stimulation should evoke activity in auditory  
430 cortex). The first contrast compared BOLD activity evoked by task stimuli (scenes versus numbers)  
431 regardless of stimulation presence, location, or pattern; and the second contrasted activation due to

432 stimulation presence (on versus off) regardless of stimuli type or stimulation location or pattern. Subject-  
433 level GLMs were used to estimate voxel-wise event-related activity regression coefficients for each trial  
434 type (i.e., scenes, numbers, TMS ON, and TMS OFF) and REML estimation methods were used to  
435 generate voxel-wise parameter estimates and measures of variability for each subject (*3dDeconvolve*,  
436 *3dREMLfit*; see above). GLM maps were analyzed at the group-level using generalized least squares  
437 with a local estimate of random effects variance (*3dMEMA*) to identify regions of significant difference  
438 ( $P < 0.001$ , t-threshold=4.07) for scenes versus numbers and for stimulation on versus off. Data from  
439 theta-patterned and beta sessions were analyzed separately due to the differences in scan parameters.

440 To test whether differences in parameters between the TBS and beta stimulation scans did not  
441 significantly affect the signal quality, the Signal-to-Fluctuation-Noise Ratio (SFNR) summary value  
442 (Friedman and Glover, 2006) was assessed and compared between the two fMRI sequences. The mean  
443 signal was divided by the standard deviation of the residuals (*3dTstat*, *3dcalc*) and then averaged within  
444 the limited task coverage mask over the whole session (*3dmaskave*) to yield one TSNR value per  
445 stimulation condition per subject.

446 To measure the effect of stimulation on activity during the memory task, performance on the  
447 retrieval task was used to back-sort fMRI data to analyze the effects of stimulation on encoding-related  
448 activity that predicted subsequent recollection (trials that were later endorsed with “Remember”  
449 responses). Subject-level GLMs estimated voxel-wise event-related activity regression coefficients for  
450 each trial type (i.e., remembered scenes with TMS ON, remembered scenes with TMS OFF, scenes not-  
451 recollected with TMS ON, scenes not-recollected with TMS OFF, numbers with TMS ON, and numbers  
452 with TMS OFF) for each stimulation condition (*3dDeconvolve*, *3dREMLfit*; see above). For stimulation  
453 conditions with “Remember” responses, there were 16 trials on average (range=6-33) per condition (trial  
454 counts did not vary by condition  $P > 0.2$ ). Trials with remembered scenes with TMS OFF were collapsed  
455 across all study sessions to create the “combined off” condition (average number of trials=27, range=15-  
456 46). Similarly, activity for numeric judgment trials was estimated, but without respect to test performance  
457 (i.e., all trials), separately for each stimulation condition, and collapsed across all study sessions for the  
458 “combined off” condition.

459           The influence of stimulation conditions on fMRI activity estimates for remembered scenes and  
460 numeric judgment trials were tested at the group level using 6-mm radius spherical regions of interest  
461 (ROIs) along the hippocampal longitudinal axis in each hemisphere. The goal was to identify locations  
462 within the MTL that responded to stimulation conditions, taking into account potential functional  
463 distinctions along the anterior-posterior MTL axis (Aggleton and Brown, 1999; Ranganath and Ritchey,  
464 2012; Poppenk et al., 2013) as in our previous experiments investigating the effects of TMS on MTL  
465 function (Wang et al., 2014; Nilakantan et al., 2019). The middle ROI in the left hemisphere was placed  
466 in the body of the hippocampus, centered at the coordinate that was targeted via its connectivity with  
467 parietal cortex as measured during the baseline session resting-state fMRI scan (centroid MNI  
468 coordinate: -30 -18 -18). Two spheres were placed anterior to this location (centroid MNI coordinates: -23  
469 -10 -21; -26 -14 -20), and two posterior (centroid MNI coordinates: -31 -22 -14; -30, -26, -12), in 4mm  
470 increments along the longitudinal axis. These coordinates were mirrored into the right hemisphere  
471 (centroid MNI coordinates: 23 -10 -21; 26 -24 -20; 30 -18 -18; 31 -22 -14; 30 -26 -12. The two most  
472 anterior spheres encompassed the head of the hippocampus and the middle and two posterior spheres  
473 fell in the body of the hippocampus. These spherical ROIs encompassed hippocampal as well as  
474 surrounding medial temporal lobe tissue. Spherical ROIs were used in lieu of more anatomically precise  
475 methods (e.g., hippocampal subfield identification) due to the limited spatial resolution imposed by the  
476 scanning parameters that are possible with the single-channel MRI head coil, which was necessary to  
477 accommodate the TMS coil.

478           Exploratory voxel-wise analysis was used to evaluate whether there were significant effects of  
479 stimulation other than in the MTL ROIs. This analysis compared activity estimates for scenes with  
480 stimulation that were later recollected between stimulation conditions. Each subject's voxel-wise  
481 regression coefficients for remembered scenes with TMS ON for every stimulation condition (HNT TBS,  
482 SMA TBS, HNT beta, SMA beta) was entered into repeated measures ANOVA (*3dANOVA3*) to assess  
483 voxels for a significant interaction between stimulation location and pattern. Clusters of significant  
484 interaction were identified using a liberal threshold (two-tailed  $P < 0.05$  voxel-wise threshold,  $t\text{-stat} = 1.96$ ,  
485  $> 40$  contiguous supra-threshold voxels) (*3dClust*). Follow-up pairwise comparisons were made of the  
486 main condition of interest (HNT TBS) versus the stimulation location control (SMA TBS) and versus the

487 stimulation pattern control (HNT beta) (*3dttest++*). For each contrast, clusters of voxels were identified  
488 using a liberal threshold (two-tailed  $P < 0.05$  voxel-wise threshold,  $t\text{-stat} = 1.96$ ,  $> 40$  contiguous supra-  
489 threshold voxels) (*3dClust*) and saved as a mask to visualize the intersection of the thresholded  
490 statistical maps.

491

## 492 Statistics

493 Statistical analysis was performed using AFNI and Matlab. Group-level analysis of multiple  
494 conditions was performed using repeated-measures factorial analysis of variance (rmANOVA), with  
495 partial eta squared ( $\eta^2_p$ ) reported as the effect size. Greenhouse-Geisser correction was applied if the  
496 assumption of sphericity was not met (significant Mauchly's test at  $P < 0.05$ ), with the corrected p-values  
497 and degrees of freedom reported ( $F_{(GG)}$ ). Pairwise comparisons were made using Students t-tests (t) or  
498 Wilcoxon signed rank tests (z) if the assumption of normality was violated (significant Shapiro-Wilk test at  
499  $P < 0.05$ ). Effect size measures were calculated as Cohen's  $d$  ( $d$ ) for the t-tests and as rank-biserial  
500 correlation ( $r$ ) for the Wilcoxon tests. All statistical tests were paired/within-subjects and were two-  
501 sided/tailed. Results are indicated as significant at \* $P < 0.05$ , \*\* $P < 0.01$ , \*\*\* $P < 0.001$ .

502

## 503 Data and materials availability

504 Raw data are freely available on the Northwestern University Neuroimaging Data Archive  
505 (<https://nunda.northwestern.edu/>). Dataset identifiers will be provided with publication to permit  
506 unrestricted access to raw data. Custom code and scripts to replicate analyses will also be available via  
507 this archive.

508

## 509 **Results**

### 510 Validation of concurrent TMS-fMRI

511 The fMRI scanning methods used for TBS and beta stimulation differed in a number of critical  
512 parameters, including parameters of the scan sequence as well as the timing of scan acquisition relative  
513 to interleaved TMS pulses (Fig. 2AB). To test whether these differences affected signal quality, the  
514 Signal-to-Fluctuation-Noise Ratio (SFNR) summary value (Friedman and Glover, 2006) was calculated

515 for each subject for the TBS and beta stimulation sessions. We expected SFNR values to be ~120, as  
516 this was the approximate SFNR value obtained when we performed the same scans on an additional  
517 subject who had the TMS coil at the same approximate locations but without any pulses delivered  
518 (average SNFR across both scans = 120.3). Furthermore, another group using the same scanner and  
519 head coil models as in this experiment reported similar SFNR values for their interleaved TMS/fMRI  
520 scans (Moisa et al., 2009). The average SFNR value for the TBS sessions was 122.5 (SD=18.3,  
521 range=94.8-160.2) and 123.4 for the beta sessions (SD=14.2, range=92.2-144.8), with no significant  
522 difference between sessions ( $P=0.75$ ). Therefore, scan stability and thus, sensitivity, did not vary by scan  
523 sequence or stimulation pattern.

524 We performed two voxel-wise fMRI analyses to confirm expected neural activity correlates of  
525 cognitive processing within the task. That is, scenes but not numbers should evoke activity in  
526 parahippocampal, fusiform, and occipital regions (Stern et al., 1996; Stark and Squire, 2001) and  
527 stimulation sensations such as TMS sounds should evoke activity in auditory cortex. The contrast of fMRI  
528 activity evoked by scenes versus numbers, calculated across stimulation presence (on and off), and  
529 location (HNT and SMA) identified significantly greater activity ( $P<0.001$ ,  $t$ -threshold=4.07) of bilateral  
530 occipital, fusiform, and posterior parahippocampal cortex as well as hippocampus for both stimulation  
531 patterns (Fig. 3A). Contrasts between TBS and beta stimulation identified no voxels with significant  
532 differences even at a liberal threshold ( $P<0.01$  uncorrected). The contrast of stimulation “on” versus “off”,  
533 calculated across stimulation location (HNT and SMA), identified significantly greater activity for “on”  
534 ( $P<0.001$ ,  $t$ -threshold=4.07) in bilateral auditory cortex for both TBS and beta stimulation (Fig. 3B).  
535 Again, the direct contrast identified no voxels with significantly different activity for TBS versus beta  
536 stimulation at a liberal threshold ( $P<0.01$  uncorrected). Notably, although auditory-related activity due to  
537 stimulation was identified robustly, the limited imaging volume did not permit identification of likely  
538 somatosensory activation. Collectively, these analyses indicate that fMRI sensitivity was sufficient for  
539 identifying typical neural signals of scene viewing and auditory stimulation despite concurrent TMS and  
540 that there was no obvious variation in sensitivity for TBS versus beta scan parameters.



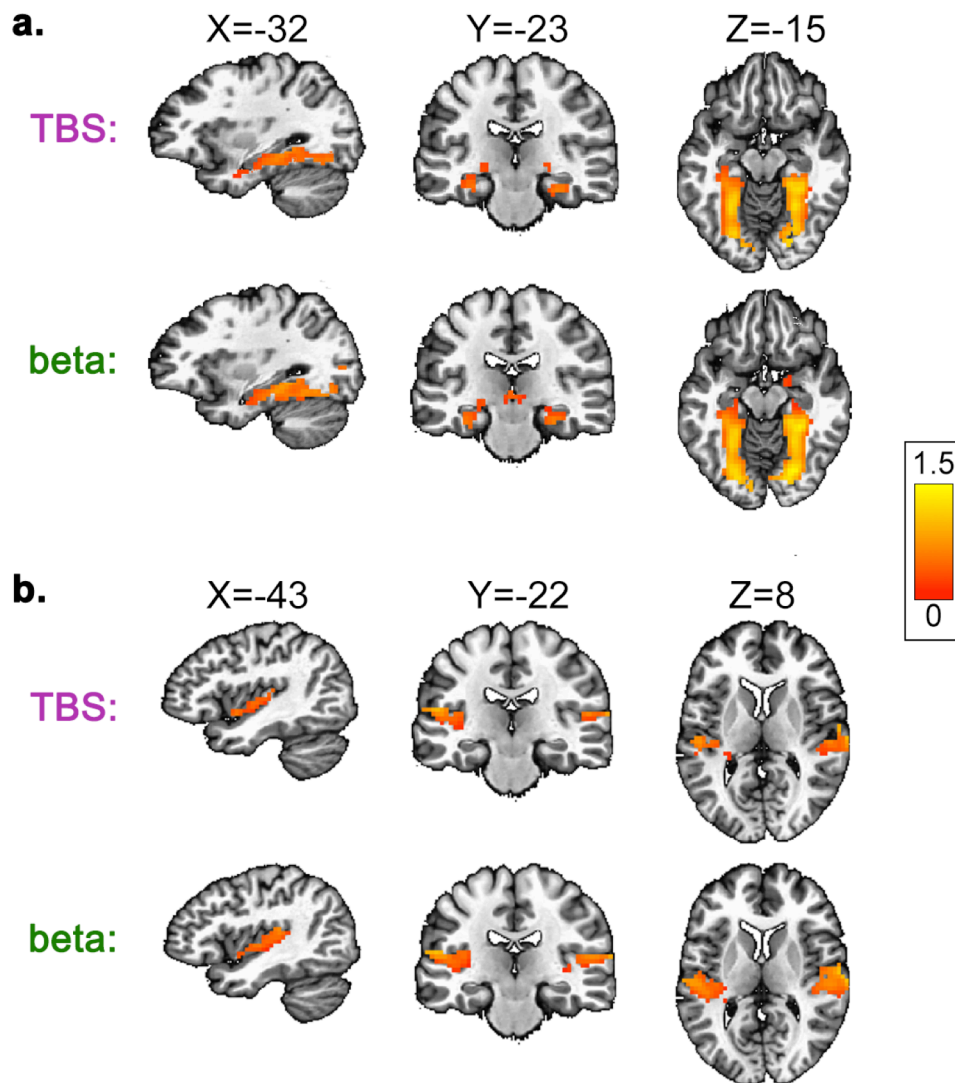

**Figure 3. Expected fMRI signals of scene processing and stimulation sensations confirm fMRI data quality during concurrent TMS.** Voxel-wise contrasts confirm that the fMRI signal could distinguish the task stimuli (scenes vs. numbers) and the presence of stimulation (ON vs. OFF). (A) Group-level contrast of scenes versus numbers, regardless of stimulation location or presence, identified significantly greater activation by scenes in the bilateral occipital, fusiform and posterior parahippocampal gyri for both TBS and beta stimulation. (B) Group-level contrast of TMS ON versus OFF, regardless of stimulation location or the stimuli type (scenes and numbers) identified significantly greater activation for TMS ON in the bilateral auditory cortex for both TBS and beta stimulation. Direct contrasts of TBS versus beta did not identify significant differences for either comparison (see main text). Plots show supra-threshold voxels on a template brain. Color bar indicates group mean percent signal change estimated by *3dMEMA*.

## 542 Effects of stimulation on memory encoding

543 We hypothesized that subsequent recollection of scenes that were stimulated during encoding  
544 would increase due to HNT TBS relative to all control stimulation conditions. Consistent with this  
545 prediction, the proportion of retrieval hits endorsed with recollection responses during the memory test  
546 that followed scanning (Fig. 4A) varied significantly by stimulation presence (on versus off), pattern (TBS  
547 versus beta), and location (HNT versus SMA) (3-way interaction  $F_{1,11}=6.63$ ,  $P=0.02$ ,  $\eta^2_p=0.44$ ) during  
548 encoding. This reflected more recollected hits for scenes preceded by HNT TBS relative to other  
549 conditions (Table 1; Fig. 4B). Post-hoc pairwise comparisons (Fig. 4B) indicated that the proportion of  
550 recollected hits was greater for HNT TBS versus the corresponding “off” condition ( $t_{15}=2.78$ ,  $P=0.01$ ,  
551  $d=0.74$ ), versus SMA TBS (matched-frequency location control:  $t_{15}=4.11$ ,  $P=0.0009$ ,  $d=1.13$ ), and  
552 marginally greater versus HNT beta (matched-location frequency control:  $t_{15}=1.97$ ,  $P=0.07$ ,  $d=0.50$ ). In  
553 contrast, none of the other stimulation conditions increased recollection relative to the “off” condition (all  
554  $P_s>0.1$ ; Fig. 4B).

555 Although it might be reasoned that evidence for effects of stimulation on memory should be  
556 obtained by comparing a particular stimulation condition versus a corresponding stimulation “off”  
557 condition, this comparison is problematic because stimulation can have a variety of nonspecific disruptive  
558 or enhancing effects on cognition (i.e., distraction, arousal, etc.). Likewise, TBS and beta stimulation vary  
559 in somatosensory and auditory qualities, which could produce distinct effects on memory for nonspecific  
560 reasons. Therefore, a rigorous way to test for differential effects of stimulation patterns on recollection is  
561 to contrast the effects of TBS versus beta stimulation when each type of stimulation targeted the  
562 hippocampal network (HNT) versus the SMA. This is because TBS is subjectively similar for HNT versus  
563 SMA, as is beta stimulation, yet these locations vary in their expected effect on memory processing. The  
564 relative recollection advantage for HNT versus SMA stimulation was greater for scenes in the TBS  
565 condition relative to scenes without stimulation (“off”) in the TBS session ( $t_{15}=3.48$ ,  $P=0.003$ ,  $d=0.87$ ),  
566 relative to scenes in the beta stimulation condition ( $t_{15}=2.26$ ,  $P=0.04$ ,  $d=0.57$ ), and relative to scenes  
567 without stimulation in the beta session ( $t_{15}=2.75$ ,  $P=0.01$ ,  $d=0.69$ ) (Fig. 4C; subject-level differences for  
568 each comparison is provided in Fig. 4D). Thus, recollection was enhanced only by HNT TBS, and this  
569 enhancement likely was not due to nonspecific sensory qualities of stimulation pattern.

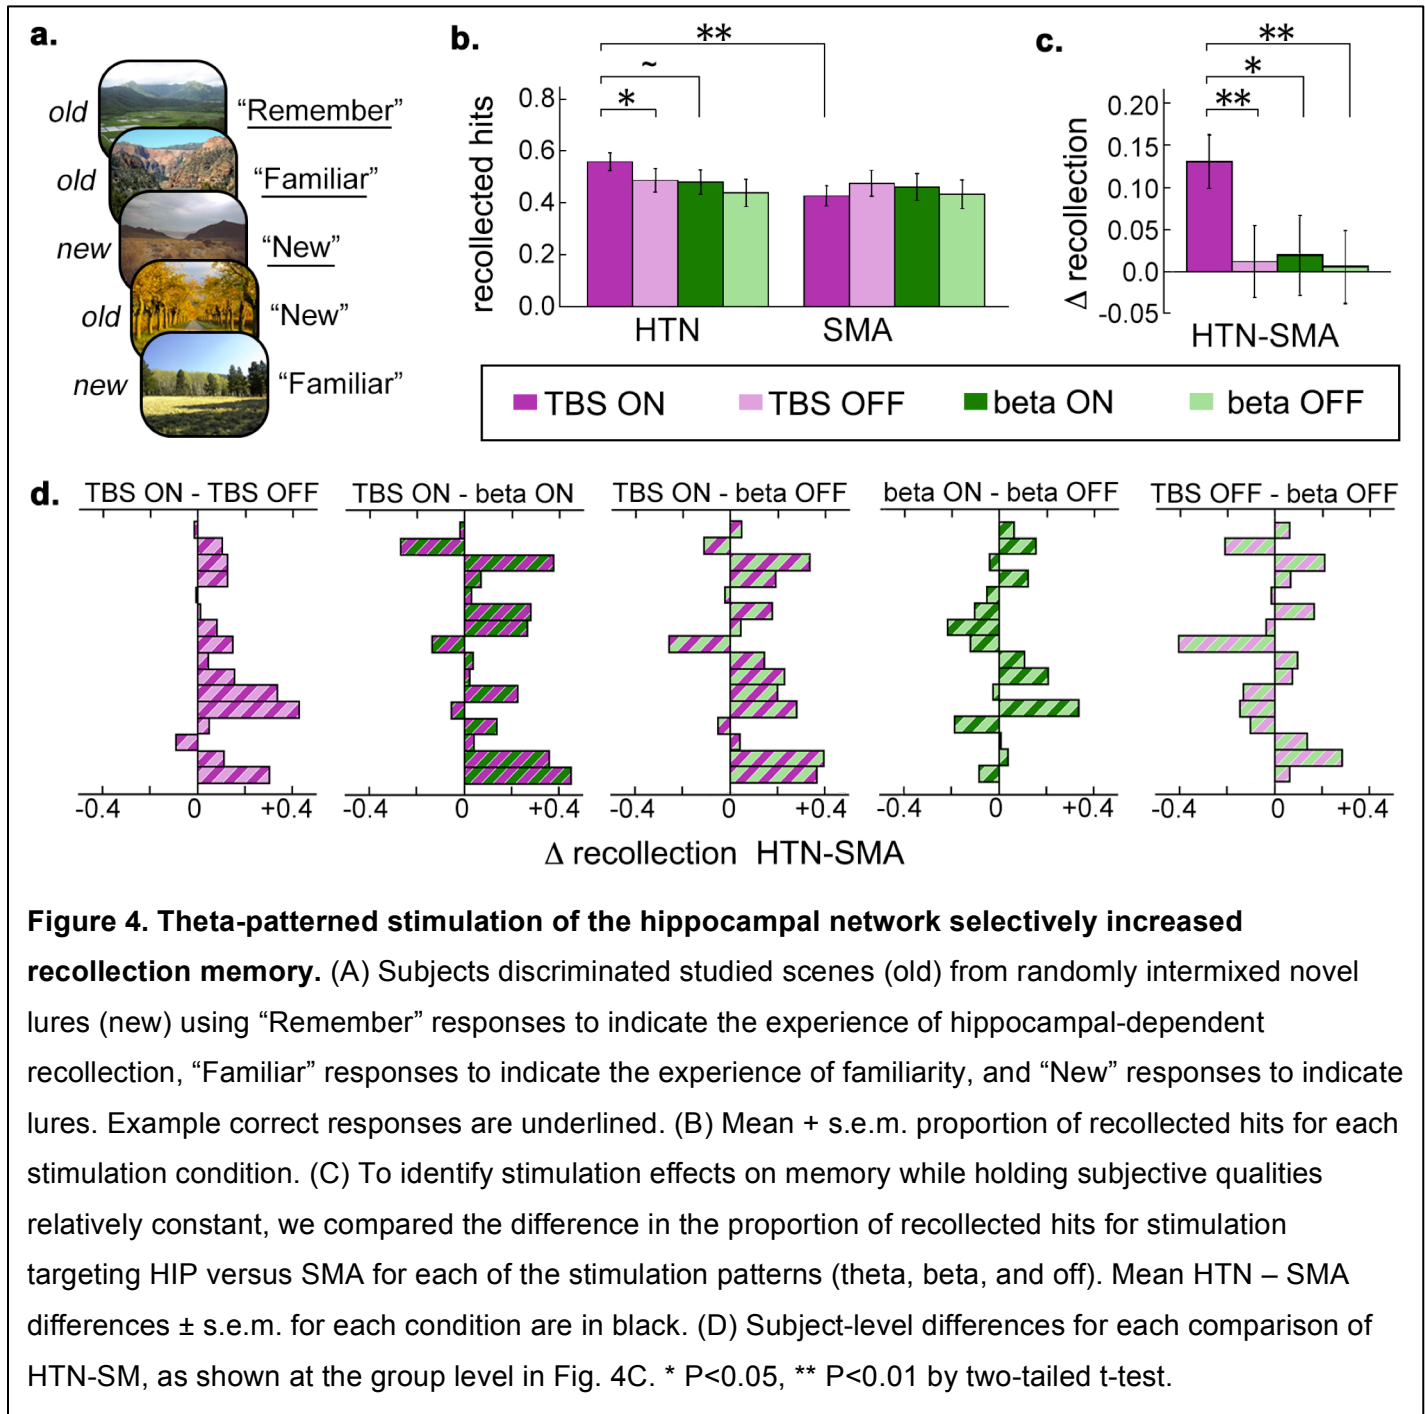

571 The effects of stimulation on memory were specific to hippocampal-dependent recollection, as  
572 stimulation did not influence overall hit rates. Overall hit rate (old items endorsed with “Remember” and  
573 “Familiar” responses) did not vary by stimulation pattern, location, or presence (all 3-way rmANOVA main  
574 effects and interactions  $P$  values  $> 0.1$ ) (Table 1). Notably however, although effects of stimulation on hit  
575 rates were not identified, overall memory strength could have been affected by stimulation, which could  
576 influence both the hit rate and the false alarm rate. The format of the experiment precluded calculation of  
577 false alarm rates separately for each stimulation condition because study phases for both stimulation  
578 locations (HNT and SMA) were tested at the end of each experimental session using the same set of  
579 novel lures (see Fig. 1D). Therefore, lures could be segregated based on stimulation pattern (TBS versus  
580 beta) but not based on stimulation location. The false alarm rate was significantly lower ( $t_{15}=2.54$ ,  
581  $P=0.02$ ,  $d=0.64$ ) for TBS (mean=0.31, SD=0.17) than beta stimulation (mean=0.38, SD=0.12),  
582 suggesting that TBS increased overall memory strength to a greater extent than beta stimulation.

583

#### 584 Effects of stimulation on medial temporal lobe activity

585 Successful memory formation is associated with relatively increased fMRI activity in the MTL  
586 (Paller and Wagner, 2002; Kim, 2011). We therefore hypothesized that HNT TBS would increase MTL  
587 fMRI activity evoked by scenes that were later recollected relative to control conditions. Stimulation  
588 effects on activity were assessed in spherical segments extending along the hippocampal longitudinal  
589 axis and including adjacent rhinal/parahippocampal cortex (Fig. 5A), as relatively large imaging voxels  
590 were required given constraints on scan parameters (see Materials and Methods). Stimulation targeted  
591 the left hippocampus/MTL via resting-state functional connectivity (Materials and Methods) and based on  
592 the relatively lateralized projections from lateral temporal cortex to ipsilateral medial temporal lobe  
593 (Mesulam et al., 1977; Mufson and Pandya, 1984). Thus, segments of the right hippocampus/MTL  
594 served as non-targeted controls.

595 For left MTL segments, activity varied significantly by the five stimulation conditions (HNT TBS,  
596 SMA TBS, HNT beta, SMA beta, and “off”) (main effect  $F_{4,375}=3.29$ ,  $P=0.02$ ,  $\eta^2_p=0.22$ ). Follow-up tests  
597 among stimulation conditions made for each MTL segment indicated that activity varied significantly by  
598 stimulation condition for the two most anterior left segments ( $F_{(GG)1.92,35.97}=4.14$ ,  $P=0.03$ ,  $\eta^2_p=0.28$ ;

599  $F_{(GG)1.73,32.37}=3.80$ ,  $P=0.04$ ,  $\eta^2_p=0.25$ ; all other  $P_s>0.1$ ) (Fig. 5A). Activity of these two anterior segments  
600 was significantly greater for HNT TBS relative to HNT beta (Wilcoxon  $z=3.15$ ,  $P=0.002$ ,  $r=0.51$ ), SMA  
601 TBS (Wilcoxon  $z=2.95$ ,  $P=0.003$ ,  $r=0.54$ ), SMA beta (Wilcoxon  $z=2.48$ ,  $P=0.01$ ,  $r=0.62$ ), and the “off”  
602 condition (Wilcoxon  $z=1.96$ ,  $P=0.04$ ,  $r=0.49$ ) (Fig. 5B). Activity was significantly lower for SMA TBS  
603 relative to the “off” condition (Wilcoxon  $z=2.33$ ,  $P=0.02$ ,  $r=0.58$ ) (Fig. 5B), suggesting that TBS out of the  
604 hippocampal network may have disrupted hippocampal/MTL activity (but see above for an explanation  
605 for why comparison to stimulation “off” conditions can be ambiguous). The same analysis performed for  
606 right (non-targeted) MTL segments yielded a numerically similar but non-significant pattern of greater  
607 activity following HNT TBS relative to other conditions ( $P_s>0.1$ ) (Fig. 5).

608 As hypothesized, MTL activity evoked by numeric judgments did not vary significantly by  
609 stimulation condition in either the left or right hemisphere (Fig. 5; main effect of condition and interaction  
610 of condition by longitudinal segment in the left and right hemispheres  $P_s>0.3$ ). Further, HNT TBS had  
611 significantly greater impact on fMRI activity during memory formation than during numeric judgments. For  
612 the two anterior left MTL segments with activity that varied by stimulation condition (Fig. 5), the difference  
613 in activity evoked by later-recalled scenes minus numeric judgments was significantly greater for HNT  
614 TBS relative to HNT beta (Wilcoxon  $z=2.17$ ,  $P=0.03$ ,  $r=0.54$ ) and relative to SMA TBS (Wilcoxon  $z=2.07$ ,  
615  $P=0.04$ ,  $r=0.52$ ). Thus, TBS targeting the hippocampal network was selective in its influence on memory  
616 processing relative to numeric processing.

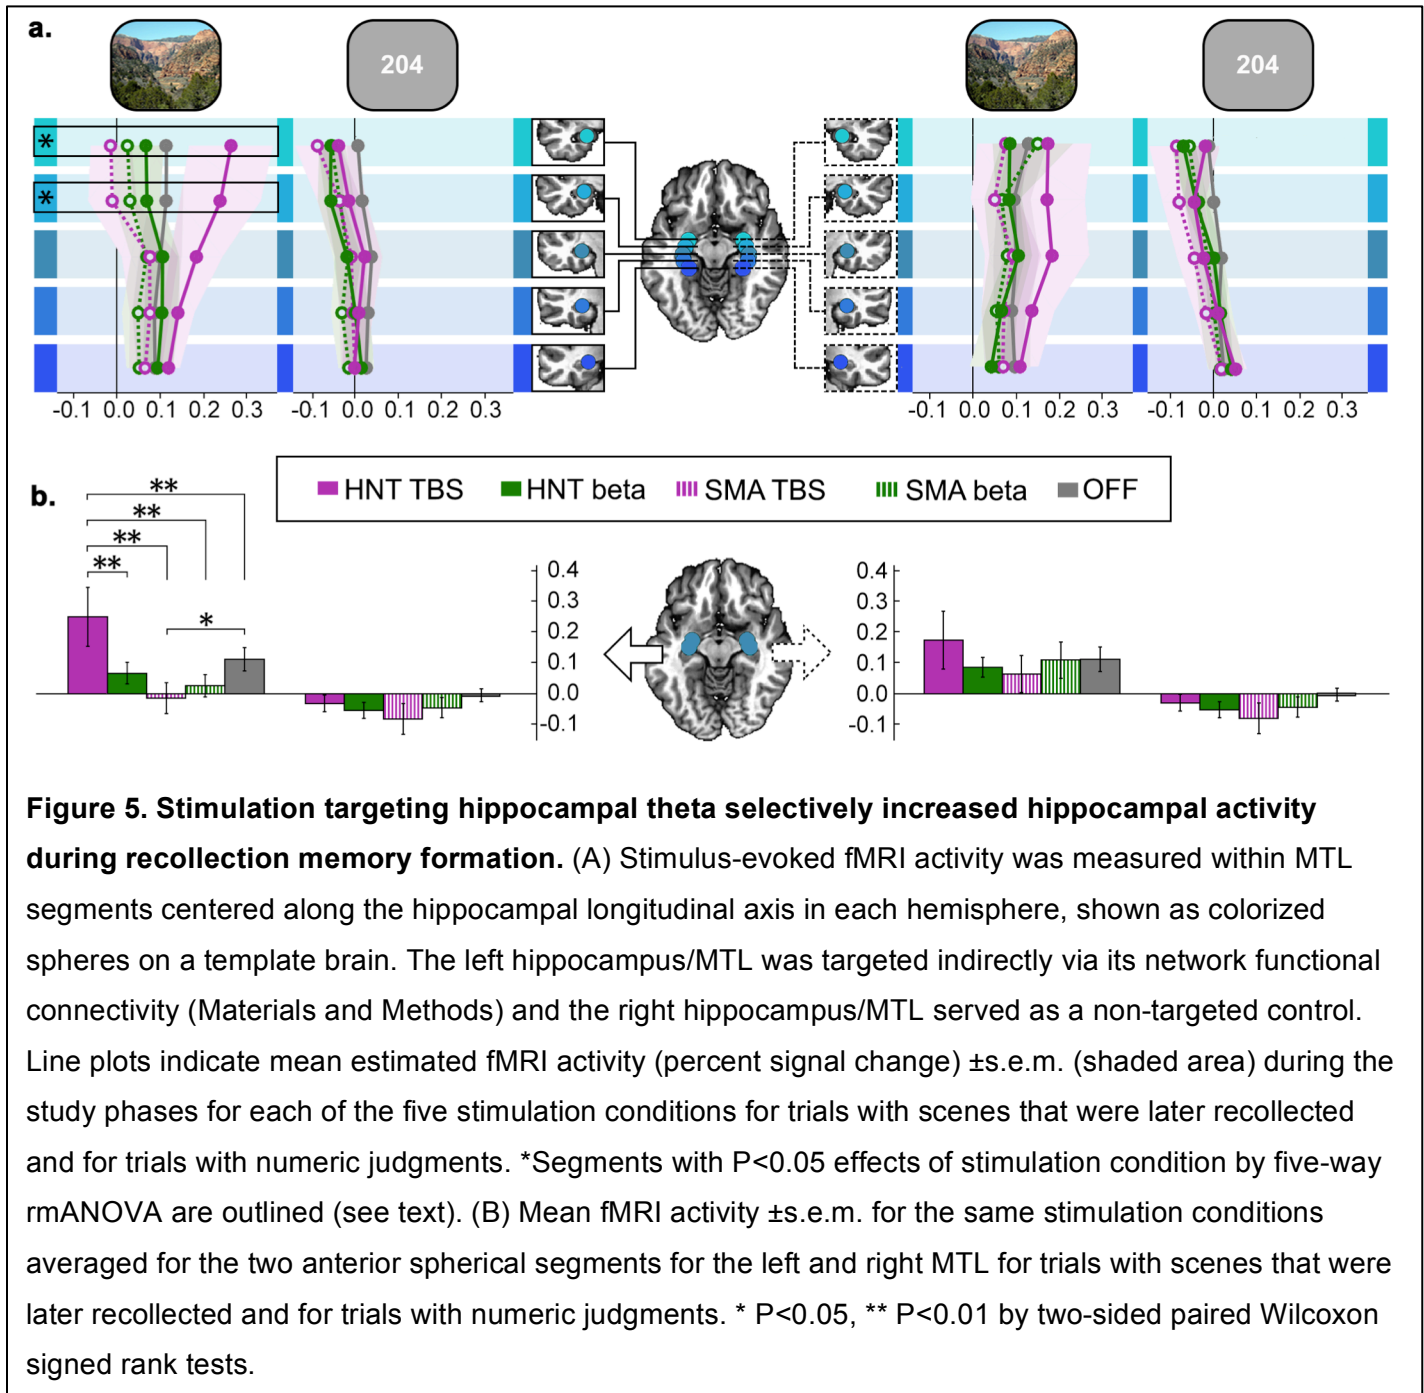



618 Exploratory voxel-wise analysis of stimulation effects on recollection-related fMRI activity

619 To further evaluate whether recollection-related activity during scene encoding for regions outside  
620 the MTL was sensitive to HNT TBS versus all control conditions, we conducted a voxel-wise exploratory  
621 analysis. A repeated measures ANOVA with a liberal statistical threshold (Methods) identified a cluster of  
622 82 voxels in the left anterior MTL (center of mass MNI = -34 -2 -20) with significant interaction between  
623 stimulation location and pattern (Fig. 6A). Follow-up pairwise comparisons were made of the main  
624 condition of interest (HNT TBS) versus the stimulation-location control (TBS of the SMA) and versus the  
625 stimulation-pattern control (HNT beta stimulation). The only region for which these two contrasts  
626 intersected (i.e., demonstrated supra-threshold voxels specific to TBS versus beta stimulation and to  
627 HNT versus SMA stimulation) was left anterior MTL (19 voxels, center of mass MNI = -30 -3 -21). For  
628 both the ANOVA and the overlap of pairwise comparisons, the location identified via this voxel-wise  
629 analysis overlapped considerably with the anterior-left hippocampal/MTL regions of interest that showed  
630 the same selective response to HNT TBS in the main analysis using ROIs (Figs. 5A, 6B). Thus, the left  
631 anterior hippocampus (head) and immediately surrounding medial temporal cortex (entorhinal/perirhinal)  
632 were the only regions identified with recollection-related activity that preferentially responded to HNT  
633 TBS.

634

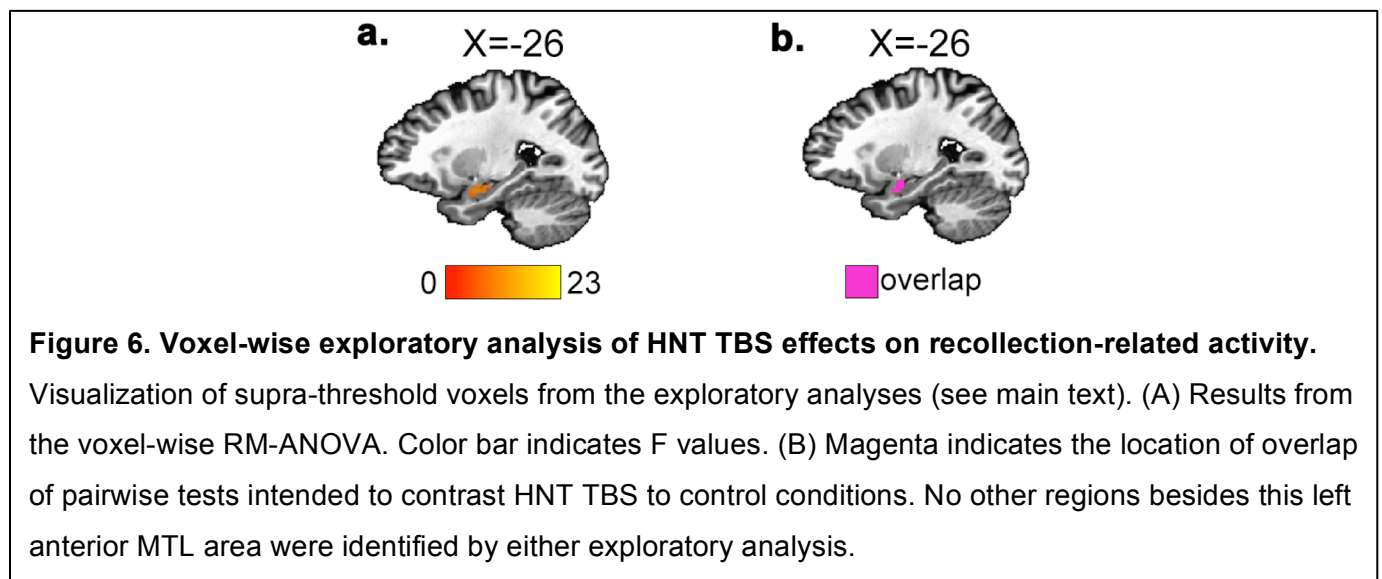

635



636 **Discussion**

637           The key findings of this experiment were that TBS targeting the hippocampal network (HNT)  
638 selectively improved memory for stimulated scenes and increased corresponding MTL fMRI activity. A  
639 number of aspects of the experiment design and the pattern of results support these key findings. The  
640 effects of stimulation on memory and MTL fMRI activity were frequency specific and location specific, in  
641 that they were not observed for beta stimulation targeting the hippocampal network nor for either  
642 stimulation condition (TBS or beta) targeting an out-of-network control location (SMA). Further, the  
643 effects were cognitively specific, in that no stimulation condition (including HNT TBS) influenced MTL  
644 fMRI activity during numeric judgments, which do not typically evoke MTL activity (Stark and Squire,  
645 2001). This indicates that TBS targeting the hippocampal network only influenced neural correlates of  
646 memory processing and provides the strongest evidence that the main findings of HNT TBS on fMRI  
647 activity were not due to TMS-related fMRI artefact, as numeric-judgment trials were intermixed with  
648 scene-encoding trials and involved the same stimulation parameters and locations. Further, the effects  
649 were specific to the left MTL, the hemisphere that was targeted via its connectivity to the left parietal area  
650 that was stimulated. A numerically similar but non-significant pattern was observed for right MTL, which  
651 could be due to commissural connectivity and is consistent with our previous findings of relatively (but  
652 not completely) lateralized effects of network-targeted TMS on the MTL (Wang et al., 2014; Nilakantan et  
653 al., 2019). Finally, TBS only influenced the recollective aspect of scene memory, which supports the  
654 conclusion that hippocampal function was affected, as recollection is particularly dependent on  
655 hippocampus (Eichenbaum et al., 2007; Ranganath and Ritchey, 2012).

656           The immediate effects of TBS targeting the hippocampal network on MTL fMRI activity and scene  
657 memory formation suggest that this type of stimulation influenced hippocampal neural activity, as  
658 opposed to neuroplasticity and/or neuromodulatory mechanisms that can support persistent/long-lasting  
659 effects of stimulation on network function (Cirillo et al., 2017). The premise of the experiment was that  
660 TBS mimics the endogenous theta-band neural activity pattern characteristic of the hippocampus and of  
661 hippocampal network synchrony (Buzsaki, 2002; Buzsaki and Draguhn, 2004; Lisman and Jensen, 2013)  
662 and therefore might optimally influence memory processing via entrainment of neural activity (Thut et al.,  
663 2011a; Hanslmayr et al., 2019). Thus, if targeting of hippocampal network theta activity via noninvasive

664 TBS were successful, we expected that it would cause population synchrony of theta and therefore  
665 increase the evoked fMRI BOLD response when presented with a visual stimulus that evokes processing  
666 by the affected region(s). Although our findings are highly consistent with this prediction, a weakness is  
667 that such theta rhythms cannot be measured with fMRI and we can only infer an impact based on the  
668 observed pattern of fMRI activity. Confirmation of this interpretation would require direct measurement of  
669 stimulation effects on hippocampal theta.

670         Nonetheless, the findings are notable in that they inform understanding of the mechanisms by  
671 which noninvasive stimulation influences activity in areas such as the MTL. Noninvasive stimulation  
672 targeting the hippocampal network can generate relatively long-lasting aftereffects within the  
673 hippocampus and broader hippocampal network (Wang et al., 2014; Kim et al., 2018; Tambini et al.,  
674 2018; Freedberg et al., 2019; Hermiller et al., 2019), with greater aftereffects when using theta-burst  
675 stimulation (Hermiller et al., 2018). The current findings provide novel mechanistic insights to these  
676 previous findings by showing that MTL activity is immediately sensitive to stimulation applied to its  
677 network and matching its endogenous theta activity pattern. This suggests an impact of hippocampal  
678 network-targeted stimulation on MTL neural activity and supports the interpretation that the effects of  
679 noninvasive stimulation targeting this network are due to the impact of stimulation on the MTL (Hebscher  
680 and Voss, in press).

681         Although the effects of HNT TBS that we observed were specific to MTL activity, it is noteworthy  
682 that sampling of activity elsewhere in the brain was limited by the fMRI methods (Materials and  
683 Methods). Nonetheless, we found no evidence for similar effects in regions other than the left medial  
684 temporal lobe in an exploratory voxel-wise analysis, and other areas of the hippocampal network were  
685 within the volume that was sampled with fMRI (particularly lateral-temporal and medial parietal-occipital  
686 cortex) (Fig. 2). This suggests that the MTL may be unique in its ability to be immediately impacted by  
687 stimulation. This is consistent with previous evidence that although hippocampal network-targeted  
688 stimulation is typically delivered at parietal cortex, the most robust effects of stimulation are on fMRI  
689 activity of the hippocampus/MTL and nearby areas of parahippocampal and retrosplenial/medial-parietal  
690 cortex (Wang et al., 2014; Kim et al., 2018; Warren et al., 2018; Freedberg et al., 2019). Although the  
691 immediate effects of stimulation were limited to the MTL, previous experiments using longer stimulation

692 trains and/or multiple days of stimulation found effects distributed throughout a greater portion of the  
693 hippocampal network (Hebscher and Voss, in press). It is possible that brief trains of TBS affect activity  
694 in only those areas most sensitive to this stimulation pattern (MTL) whereas more extensive stimulation  
695 regimens produce expanded recruitment. This is a direction for future experiments.

696 A limitation of the current experiment is that the memory test was given after both study phases  
697 on a given experiment session, and those study phases differed in the location of stimulation (HNT  
698 versus SMA), keeping stimulation rhythm constant (TBS or beta). Thus, we could not compare the  
699 effects of stimulation location on memory accuracy, as novel foils were not segregated by stimulation  
700 location. Nonetheless, we did find reduced false alarms to novel foils for TBS versus beta stimulation as  
701 well as an increase in hit rates for TBS delivered to the hippocampal network (HNT) versus to the SMA  
702 control location (Table 1). This pattern of findings suggests that HNT TBS potentially increased memory  
703 accuracy relative to HNT SMA and to the beta stimulation conditions, but this cannot be confirmed given  
704 the limitation of the design. Furthermore, the main analysis strategy (Fig. 4) found that HNT TBS  
705 increased the proportion of hits endorsed with recollection responses. Recollection responses typically  
706 correlate very highly with memory accuracy (Yonelinas, 2001) and are associated with hippocampal  
707 contributions to memory (Eichenbaum et al., 2007; Ranganath and Ritchey, 2012). Thus, TBS targeting  
708 the hippocampal network improved recollection, but future experiment will be needed to fully confirm  
709 whether memory accuracy can be similarly improved.

710 Although TBS targeting the hippocampal network (HNT) was the only condition that significantly  
711 improved memory encoding and increased MTL fMRI activity, the overall pattern of results suggest that  
712 other stimulation conditions may have had a negative impact on encoding and MTL fMRI activity. There  
713 was numeric but non-significant reduction in the proportion of recollected hits for TBS targeting SMA  
714 relative to the corresponding “off” condition (Table 1; Fig. 4B). Furthermore, there was numeric reduction  
715 in left MTL activity relative to the “off” condition in all stimulation conditions other than HNT TBS (Fig. 5),  
716 and this reduction was significant for TBS targeting SMA. This suggests that stimulation frequencies not  
717 well aligned with hippocampal theta could have disruptive immediate effects on MTL memory processing.  
718 It is also possible that TMS is simply distracting relative to “off”, particularly for the TBS pattern, and that  
719 the beneficial effects of TBS targeting the hippocampal network are sufficient to counteract this negative

720 impact and produce improvement. However, the relative reductions in activity for stimulation conditions  
721 other than HNT TBS seemed to be more pronounced for the left (targeted) rather than right (non-  
722 targeted) hemisphere, which is inconsistent with explanations involving general factors such as  
723 distraction. In either case, the weak reductions in memory and MTL activity for most stimulation  
724 conditions stand in contrast to the significant enhancement seen for HNT TBS, suggesting that only this  
725 type of stimulation can produce an immediate enhancement of MTL memory processing.

726         Theta oscillations in the hippocampus and surrounding medial temporal lobe could provide a  
727 temporal framework for information coding and memory (Buzsaki, 2002) and could support memory-  
728 related synchrony among distributed locations of the hippocampal network. Hippocampal network  
729 dysfunction is related to memory impairments in a variety of psychiatric, neurological, and  
730 neurodegenerative disorders (Andrews-Hanna et al., 2007; Buckner et al., 2008; Dickerson and  
731 Eichenbaum, 2010; Small et al., 2011). The current findings suggest that memory processing by the core  
732 MTL area of this network can be immediately and beneficially influenced via noninvasive stimulation  
733 when stimulation targets the network and is matched to its endogenous activity rhythm. This provides  
734 mechanistic insights relevant to the many previous findings of lasting improvements in memory due to  
735 noninvasive stimulation targeting the hippocampal network (Hebscher and Voss, in press). Given the  
736 immediate impact and relatively precise locus of stimulation-related activity changes, concurrent TBS  
737 with fMRI could be a powerful tool for testing a variety of hypothesized MTL contributions to memory and  
738 cognition.

739 **References:**

- 740 Aggleton JP, Brown MW (1999) Episodic memory, amnesia, and the hippocampal-anterior thalamic axis.  
741 Behav Brain Sci 22:425-444; discussion 444-489.
- 742 Andrews-Hanna JR, Snyder AZ, Vincent JL, Lustig C, Head D, Raichle ME, Buckner RL (2007)  
743 Disruption of large-scale brain systems in advanced aging. Neuron 56:924-935.
- 744 Battaglia FP, Benchenane K, Sirota A, Pennartz CM, Wiener SI (2011) The hippocampus: hub of brain  
745 network communication for memory. Trends Cogn Sci 15:310-318.
- 746 Bestmann S, Ruff CC, Blankenburg F, Weiskopf N, Driver J, Rothwell JC (2008) Mapping causal  
747 interregional influences with concurrent TMS-fMRI. Exp Brain Res 191:383-402.
- 748 Buckner RL, Andrews-Hanna JR, Schacter DL (2008) The brain's default network: anatomy, function,  
749 and relevance to disease. Ann N Y Acad Sci 1124:1-38.
- 750 Buzsaki G (2002) Theta oscillations in the hippocampus. Neuron 33:325-340.
- 751 Buzsaki G, Draguhn A (2004) Neuronal oscillations in cortical networks. Science 304:1926-1929.
- 752 Chanes L, Quentin R, Tallon-Baudry C, Valero-Cabre A (2013) Causal frequency-specific contributions  
753 of frontal spatiotemporal patterns induced by non-invasive neurostimulation to human visual  
754 performance. J Neurosci 33:5000-5005.
- 755 Cirillo G, Di Pino G, Capone F, Ranieri F, Florio L, Todisco V, Tedeschi G, Funke K, Di Lazzaro V (2017)  
756 Neurobiological after-effects of non-invasive brain stimulation. Brain Stimul 10:1-18.
- 757 Coleshill SG, Binnie CD, Morris RG, Alarcon G, van Emde Boas W, Velis DN, Simmons A, Polkey CE,  
758 van Veelen CW, van Rijen PC (2004) Material-specific recognition memory deficits elicited by  
759 unilateral hippocampal electrical stimulation. J Neurosci 24:1612-1616.
- 760 Cox RW (1996) AFNI: software for analysis and visualization of functional magnetic resonance  
761 neuroimages. Comput Biomed Res 29:162-173.
- 762 Demeter E, Mirdamadi JL, Meehan SK, Taylor SF (2016) Short theta burst stimulation to left frontal  
763 cortex prior to encoding enhances subsequent recognition memory. Cogn Affect Behav Neurosci  
764 16:724-735.
- 765 Dickerson BC, Eichenbaum H (2010) The episodic memory system: neurocircuitry and disorders.  
766 Neuropsychopharmacology 35:86-104.
- 767 Eichenbaum H, Yonelinas AP, Ranganath C (2007) The medial temporal lobe and recognition memory.  
768 Annu Rev Neurosci 30:123-152.
- 769 Ezzyat Y et al. (2018) Closed-loop stimulation of temporal cortex rescues functional networks and  
770 improves memory. Nat Commun 9:365.
- 771 Fell J, Klaver P, Lehnertz K, Grunwald T, Schaller C, Elger CE, Fernandez G (2001) Human memory  
772 formation is accompanied by rhinal-hippocampal coupling and decoupling. Nat Neurosci 4:1259-  
773 1264.
- 774 Fell J, Ludowig E, Staresina BP, Wagner T, Kranz T, Elger CE, Axmacher N (2011) Medial temporal  
775 theta/alpha power enhancement precedes successful memory encoding: evidence based on  
776 intracranial EEG. J Neurosci 31:5392-5397.
- 777 Foster BL, Kaveh A, Dastjerdi M, Miller KJ, Parvizi J (2013) Human retrosplenial cortex displays transient  
778 theta phase locking with medial temporal cortex prior to activation during autobiographical  
779 memory retrieval. J Neurosci 33:10439-10446.
- 780 Fox MD, Halko MA, Eldaief MC, Pascual-Leone A (2012) Measuring and manipulating brain connectivity  
781 with resting state functional connectivity magnetic resonance imaging (fcMRI) and transcranial  
782 magnetic stimulation (TMS). Neuroimage 62:2232-2243.
- 783 Freedberg M, Reeves JA, Toader AC, Hermiller MS, Voss JL, Wassermann EM (2019) Persistent  
784 Enhancement of Hippocampal Network Connectivity by Parietal rTMS Is Reproducible. eNeuro 6.
- 785 Friedman L, Glover GH (2006) Report on a multicenter fMRI quality assurance protocol. J Magn Reson  
786 Imaging 23:827-839.
- 787 Goyal A, Miller J, Watrous AJ, Lee SA, Coffey T, Sperling MR, Sharan A, Worrell G, Berry B, Lega B,  
788 Jobst BC, Davis KA, Inman C, Sheth SA, Wanda PA, Ezzyat Y, Das SR, Stein J, Gorniak R,  
789 Jacobs J (2018) Electrical Stimulation in Hippocampus and Entorhinal Cortex Impairs Spatial and  
790 Temporal Memory. J Neurosci 38:4471-4481.
- 791 Hanslmayr S, Axmacher N, Inman CS (2019) Modulating Human Memory via Entrainment of Brain  
792 Oscillations. Trends Neurosci 42:485-499.



- 793 Hebscher M, Voss JL (in press) Testing network properties of episodic memory using non-invasive brain  
794 stimulation. *Current opinion in behavioral sciences*.
- 795 Hermiller MS, VanHaerents S, Raij T, Voss JL (2018) Frequency-specific noninvasive modulation of  
796 memory retrieval and its relationship with hippocampal network connectivity. *Hippocampus*.
- 797 Hermiller MS, Karp E, Nilakantan AS, Voss JL (2019) Episodic memory improvements due to  
798 noninvasive stimulation targeting the cortical-hippocampal network: A replication and extension  
799 experiment. *Brain Behav* 9:e01393.
- 800 Herweg NA, Solomon EA, Kahana MJ (2020) Theta Oscillations in Human Memory. *Trends Cogn Sci*  
801 24:208-227.
- 802 Huang YZ, Edwards MJ, Rounis E, Bhatia KP, Rothwell JC (2005) Theta burst stimulation of the human  
803 motor cortex. *Neuron* 45:201-206.
- 804 Jacobs J, Miller J, Lee SA, Coffey T, Watrous AJ, Sperling MR, Sharan A, Worrell G, Berry B, Lega B,  
805 Jobst BC, Davis K, Gross RE, Sheth SA, Ezzyat Y, Das SR, Stein J, Gorniak R, Kahana MJ,  
806 Rizzuto DS (2016) Direct Electrical Stimulation of the Human Entorhinal Region and  
807 Hippocampus Impairs Memory. *Neuron* 92:983-990.
- 808 Kim H (2011) Neural activity that predicts subsequent memory and forgetting: a meta-analysis of 74 fMRI  
809 studies. *Neuroimage* 54:2446-2461.
- 810 Kim S, Nilakantan AS, Hermiller MS, Palumbo RT, VanHaerents S, Voss JL (2018) Selective and  
811 coherent activity increases due to stimulation indicate functional distinctions between episodic  
812 memory networks. *Sci Adv* 4:eaar2768.
- 813 Kohler S, Paus T, Buckner RL, Milner B (2004) Effects of left inferior prefrontal stimulation on episodic  
814 memory formation: a two-stage fMRI-rTMS study. *J Cogn Neurosci* 16:178-188.
- 815 Kucewicz MT, Berry BM, Miller LR, Khadjevand F, Ezzyat Y, Stein JM, Kremen V, Brinkmann BH,  
816 Wanda P, Sperling MR, Gorniak R, Davis KA, Jobst BC, Gross RE, Lega B, Van Gompel J, Stead  
817 SM, Rizzuto DS, Kahana MJ, Worrell GA (2018) Evidence for verbal memory enhancement with  
818 electrical brain stimulation in the lateral temporal cortex. *Brain* 141:971-978.
- 819 Lisman JE, Jensen O (2013) The theta-gamma neural code. *Neuron* 77:1002-1016.
- 820 Mesulam MM, Van Hoesen GW, Pandya DN, Geschwind N (1977) Limbic and sensory connections of  
821 the inferior parietal lobule (area PG) in the rhesus monkey: a study with a new method for  
822 horseradish peroxidase histochemistry. *Brain Res* 136:393-414.
- 823 Miller JP, Sweet JA, Bailey CM, Munyon CN, Luders HO, Fastenau PS (2015) Visual-spatial memory  
824 may be enhanced with theta burst deep brain stimulation of the fornix: a preliminary investigation  
825 with four cases. *Brain* 138:1833-1842.
- 826 Moisa M, Pohmann R, Ewald L, Thielscher A (2009) New coil positioning method for interleaved  
827 transcranial magnetic stimulation (TMS)/functional MRI (fMRI) and its validation in a motor cortex  
828 study. *J Magn Reson Imaging* 29:189-197.
- 829 Mufson EJ, Pandya DN (1984) Some observations on the course and composition of the cingulum  
830 bundle in the rhesus monkey. *J Comp Neurol* 225:31-43.
- 831 Nilakantan AS, Mesulam MM, Weintraub S, Karp EL, VanHaerents S, Voss JL (2019) Network-targeted  
832 stimulation engages neurobehavioral hallmarks of age-related memory decline. *Neurology*  
833 92:e2349-e2354.
- 834 Paller KA, Wagner AD (2002) Observing the transformation of experience into memory. *Trends Cogn Sci*  
835 6:93-102.
- 836 Poppenk J, Evensmoen HR, Moscovitch M, Nadel L (2013) Long-axis specialization of the human  
837 hippocampus. *Trends Cogn Sci* 17:230-240.
- 838 Ranganath C, Ritchey M (2012) Two cortical systems for memory-guided behaviour. *Nat Rev Neurosci*  
839 13:713-726.
- 840 Ranganath C, Yonelinas AP, Cohen MX, Dy CJ, Tom SM, D'Esposito M (2004) Dissociable correlates of  
841 recollection and familiarity within the medial temporal lobes. *Neuropsychologia* 42:2-13.
- 842 Romei V, Thut G, Silvanto J (2016) Information-Based Approaches of Noninvasive Transcranial Brain  
843 Stimulation. *Trends Neurosci* 39:782-795.
- 844 Rossi S, Hallett M, Rossini PM, Pascual-Leone A, Group SoTC (2009) Safety, ethical considerations,  
845 and application guidelines for the use of transcranial magnetic stimulation in clinical practice and  
846 research. *Clin Neurophysiol* 120.

- 847 Rutishauser U, Ross IB, Mamelak AN, Schuman EM (2010) Human memory strength is predicted by  
848 theta-frequency phase-locking of single neurons. *Nature* 464:903-907.
- 849 Shirvalkar PR, Rapp PR, Shapiro ML (2010) Bidirectional changes to hippocampal theta-gamma  
850 comodulation predict memory for recent spatial episodes. *Proc Natl Acad Sci U S A* 107:7054-  
851 7059.
- 852 Siebner HR et al. (2009) Consensus paper: combining transcranial stimulation with neuroimaging. *Brain*  
853 *Stimul* 2:58-80.
- 854 Small SA, Schobel SA, Buxton RB, Witter MP, Barnes CA (2011) A pathophysiological framework of  
855 hippocampal dysfunction in ageing and disease. *Nat Rev Neurosci* 12:585-601.
- 856 Squire LR, Zola-Morgan S (1991) The medial temporal lobe memory system. *Science* 253:1380-1386.
- 857 Squire LR, Stark CE, Clark RE (2004) The medial temporal lobe. *Annu Rev Neurosci* 27:279-306.
- 858 Stark CE, Squire LR (2001) When zero is not zero: the problem of ambiguous baseline conditions in  
859 fMRI. *Proc Natl Acad Sci U S A* 98:12760-12766.
- 860 Staudigl T, Hanslmayr S (2013) Theta oscillations at encoding mediate the context-dependent nature of  
861 human episodic memory. *Curr Biol* 23:1101-1106.
- 862 Stern CE, Corkin S, Gonzalez RG, Guimaraes AR, Baker JR, Jennings PJ, Carr CA, Sugiura RM,  
863 Vedantham V, Rosen BR (1996) The hippocampal formation participates in novel picture  
864 encoding: evidence from functional magnetic resonance imaging. *Proc Natl Acad Sci U S A*  
865 93:8660-8665.
- 866 Tambini A, Nee DE, D'Esposito M (2018) Hippocampal-targeted Theta-burst Stimulation Enhances  
867 Associative Memory Formation. *J Cogn Neurosci* 30:1452-1472.
- 868 Thickbroom GW (2007) Transcranial magnetic stimulation and synaptic plasticity: experimental  
869 framework and human models. *Exp Brain Res* 180:583-593.
- 870 Thut G, Schyns PG, Gross J (2011a) Entrainment of perceptually relevant brain oscillations by non-  
871 invasive rhythmic stimulation of the human brain. *Front Psychol* 2:170.
- 872 Thut G, Veniero D, Romei V, Miniussi C, Schyns P, Gross J (2011b) Rhythmic TMS causes local  
873 entrainment of natural oscillatory signatures. *Curr Biol* 21:1176-1185.
- 874 Thut G, Bergmann TO, Frohlich F, Soekadar SR, Brittain JS, Valero-Cabre A, Sack AT, Miniussi C, Antal  
875 A, Siebner HR, Ziemann U, Herrmann CS (2017) Guiding transcranial brain stimulation by  
876 EEG/MEG to interact with ongoing brain activity and associated functions: A position paper. *Clin*  
877 *Neurophysiol* 128:843-857.
- 878 Titiz AS, Hill MRH, Mankin EA, Aghajan ZM, Eliashiv D, Tchemodanov N, Maoz U, Stern J, Tran ME,  
879 Schuette P, Behnke E, Suthana NA, Fried I (2017) Theta-burst microstimulation in the human  
880 entorhinal area improves memory specificity. *Elife* 6.
- 881 Wang JX, Rogers LM, Gross EZ, Ryals AJ, Dokucu ME, Brandstatt KL, Hermiller MS, Voss JL (2014)  
882 Targeted enhancement of cortical-hippocampal brain networks and associative memory. *Science*  
883 345:1054-1057.
- 884 Warren K, Hermiller MS, Nilakantan A, Voss JL (2020) Stimulating the hippocampal posterior-medial  
885 network enhances task-dependent connectivity and memory. *Elife*.
- 886 Warren KN, Hermiller MS, Nilakantan AS, O'Neil J, Palumbo RT, Voss JL (2018) Increased fMRI activity  
887 correlations in autobiographical memory versus resting states. *Hum Brain Mapp* 39:4312-4321.
- 888 Xia M, Wang J, He Y (2013) BrainNet Viewer: a network visualization tool for human brain connectomics.  
889 *PLoS One* 8:e68910.
- 890 Xiao JX, Ehinger KA, Hays J, Torralba A, Oliva A (2016) SUN Database: Exploring a Large Collection of  
891 Scene Categories. *International Journal of Computer Vision* 119:3-22.
- 892 Yonelinas AP (2001) Consciousness, control, and confidence: the 3 Cs of recognition memory. *J Exp*  
893 *Psychol Gen* 130:361-379.
- 894 Yonelinas AP (2002) The nature of recollection and familiarity: A review of 30 years of research. *Journal*  
895 *of Memory and Language* 46:441-517.
- 896 Zutshi I, Brandon MP, Fu ML, Donegan ML, Leutgeb JK, Leutgeb S (2018) Hippocampal Neural Circuits  
897 Respond to Optogenetic Pacing of Theta Frequencies by Generating Accelerated Oscillation  
898 Frequencies. *Curr Biol* 28:1179-1188 e1173.
- 899



900 **Table 1. Behavioral performance.** For the test phase in both sessions, the total hit rate (i.e., both  
 901 Remember and Familiar responses) and the proportion of hits that were recollected (i.e., Remember  
 902 responses; R if hit) are provided for the scenes that were presented during the study phases for the HNT  
 903 and SMA location conditions, for trials with stimulation (TMS ON) and without (TMS OFF). The total false  
 904 alarm rate (i.e., both Remember and Familiar responses) and the proportion of false alarms that were  
 905 endorsed with recollection (R if false alarm) are provided for scenes that were not presented during the  
 906 study phase (and thus, were only specific to the session). Values reported for the HNT TBS condition of  
 907 interest are in bold font; control conditions that significantly differ from the HNT TBS condition in two-  
 908 tailed t-tests are indicated (~ P<0.1, \* P<0.05, \*\* P<0.01). TMS OFF values that significantly differ via  
 909 two-tailed t-tests from the corresponding TMS ON condition (i.e., value in row directly above) are  
 910 indicated (~ P<0.1, \* P<0.05, \*\* P<0.01). Across-participant means (SD).  
 911

|                            | <u>TBS session</u> |                | <u>Beta stimulation session</u> |               |
|----------------------------|--------------------|----------------|---------------------------------|---------------|
|                            | HTN                | SMA            | HTN                             | SMA           |
| Total hit rate, TMS ON     | <b>0.66 (0.10)</b> | 0.61 (0.16)    | 0.67 (0.12)                     | 0.66 (0.16)   |
| Total hit rate, TMS OFF    | 0.63 (0.13)        | 0.62 (0.19)    | 0.62 (0.15) *                   | 0.64 (0.13)   |
| Recollection hits, TMS ON  | <b>0.56 (0.13)</b> | 0.42 (0.15) ** | 0.48 (0.19) ~                   | 0.46 (0.21) ~ |
| Recollection hits, TMS OFF | 0.48 (0.18) *      | 0.47 (0.20)    | 0.44 (0.21)                     | 0.43 (0.22)   |
| Total false alarm rate     | <b>0.31 (0.17)</b> |                | 0.38 (0.12) *                   |               |
| Recollection false alarms  | <b>0.17 (0.10)</b> |                | 0.21 (0.23)                     |               |

912
